# Supplementary material
Source: publisher figshare collection journal article supplement (https://karger.figshare.com/ndownloader/files/36006857)
Supplement: Supplementary file 1 [file 36006857]

## Sheet: highly_variable_band1
entrezid	genename	symbol	resting_immature_v_mature_logfc	resting_immature_v_mature_P.adj	mature_ifn_sfv_v_resting_logfc	mature_ifn_sfv_v_resting_P.adj	mature_sfv_v_resting_logfc	mature_sfv_v_resting_P.adj	mature_ifn_v_resting_logfc	mature_ifn_v_resting_P.adj	immature_ifn_sfv_v_resting_logfc	immature_ifn_sfv_v_resting_P.adj	immature_sfv_v_resting_logfc	immature_sfv_v_resting_P.adj	immature_ifn_v_resting_logfc	immature_ifn_v_resting_P.adj
16977	leucine rich repeat containing 23	Lrrc23	-6.56204	2.44584e-12	-0.875417	4.23312e-05	-0.756718	0.0038352	0.213759	0.859714	1.7778	0.00376463	1.22074	0.351885	1.84886	0.186415
26968	immunoglobulin superfamily containing leucine-rich repeat	Islr	-4.32855	4.9671e-15	0.103345	0.432267	-2.9218	7.64576e-10	-0.277665	0.591493	0.518658	0.054504	-0.709972	0.315997	-0.695277	0.999804
26900	DEAD (Asp-Glu-Ala-Asp) box polypeptide 3, Y-linked	Ddx3y	-10.0026	9.82897e-14	1.1244	3.43865e-09	1.28723	6.77814e-09	0.00724886	0.998865	0.433419	0.610659	0.233279	0.905951	-0.245861	0.999804
22029	TNF receptor-associated factor 1	Traf1	-6.17411	5.70113e-14	-1.00696	4.42716e-06	-2.75634	7.85073e-09	-0.0593849	0.991153	-0.309911	0.56264	-0.208322	0.853463	0.0258762	0.999804
22625	mitogen-activated protein kinase kinase kinase 19	Map3k19	-5.01553	1.58678e-13	-2.16149	1.69812e-10	-3.51845	9.54259e-09	-0.0735305	0.981405	-0.359729	0.43286	0.139161	0.884805	0.179491	0.999804
269959	ADAMTS-like 3	Adamtsl3	-5.35133	1.55653e-14	-0.682595	0.000112036	-2.29023	1.54281e-08	-0.0118349	0.998865	0.560714	0.130723	-0.0687067	0.943568	0.438896	0.999804
212892	radial spoke head 4 homolog A (Chlamydomonas)	Rsph4a	-5.41939	4.69162e-14	-1.30728	1.98613e-08	-2.35327	2.45168e-08	0.173933	0.870272	0.600725	0.136792	-0.212361	0.815784	-0.094341	0.999804
22403	cellular communication network factor 5	Ccn5	-5.27181	1.37745e-15	-1.18578	1.71502e-08	-1.63576	3.4359e-08	0.176376	0.85829	-0.20666	0.551882	-0.55093	0.435611	-0.697213	0.999804
26908	eukaryotic translation initiation factor 2, subunit 3, structural gene Y-linked	Eif2s3y	-9.37129	2.50028e-14	0.427989	0.000647225	1.08524	4.83296e-08	0.0359321	0.993497	-0.208318	0.782595	-0.425081	0.773651	-0.899527	0.999804
20423	sonic hedgehog	Shh	-4.49896	6.08788e-13	-1.0554	2.9153e-06	-3.06938	5.91445e-08	0.145738	0.946029	-0.370356	0.402727	-0.626388	0.476351	-0.316387	0.999804
18295	osteoglycin	Ogn	-4.41237	3.86998e-12	-1.35827	6.9758e-06	-4.09197	9.14839e-08	0.156284	0.961974	-0.479158	0.301127	-0.50635	0.564089	-0.157144	0.999804
80290	G protein-coupled receptor 146	Gpr146	-4.57808	2.21343e-12	-1.19298	3.23579e-06	-3.23902	1.71427e-07	-0.109519	0.970555	-0.421748	0.389941	-0.579502	0.540769	0.117477	0.999804
94227	peptidase inhibitor 15	Pi15	-5.74184	8.98358e-12	-3.00325	5.18848e-10	-4.02094	2.01154e-07	0.260788	0.858526	0.0381981	0.956886	0.0764045	0.961628	-0.264029	0.999804
277468	solute carrier family 39 (zinc transporter), member 12	Slc39a12	-4.35399	1.07283e-12	-1.17806	9.24099e-06	-2.61359	2.069e-07	0.0450923	0.998501	-0.732489	0.0959211	-0.714557	0.423859	-0.102036	0.999804
219170	family with sequence similarity 216, member B	Fam216b	-5.85041	1.1053e-12	-1.72502	1.39542e-08	-2.66725	2.41661e-07	0.0545098	0.99119	-0.392647	0.522796	-0.450318	0.694833	0.245052	0.999804
56175	beta-site APP-cleaving enzyme 2	Bace2	-5.83312	6.05013e-15	-0.447852	0.00627597	-1.47501	4.3464e-07	0.204804	0.858526	0.295295	0.455192	0.382735	0.591312	0.680033	0.999804
94284	UDP glucuronosyltransferase 1 family, polypeptide A6A	Ugt1a6a	-4.74397	5.03357e-11	-0.267708	0.185062	-3.89873	5.70979e-07	-0.191781	0.94423	0.311638	0.584597	-0.655533	0.576288	0.113369	0.999804
574402	G protein-coupled receptor 17	Gpr17	-4.63204	5.36108e-11	-6.94448	1.81169e-09	-5.21935	5.83591e-07	-0.380901	0.762363	-3.05359	0.00141881	-0.710673	0.548227	0.216026	0.999804
212190	UBX domain protein 10	Ubxn10	-4.9424	2.28516e-12	-1.14382	2.54527e-06	-2.44356	6.65147e-07	0.0617344	0.989811	-0.922261	0.0956641	-0.119694	0.92076	0.566872	0.999804
74516	RIKEN cDNA A730049H05 gene	A730049H05Rik	-5.22811	1.26721e-12	-1.34178	1.01019e-06	-2.33496	7.01117e-07	0.0858993	0.981405	-0.975598	0.0972835	-0.886356	0.444943	-0.168073	0.999804
11829	aquaporin 4	Aqp4	-4.41141	3.3547e-10	-0.878611	0.0114299	-4.19876	9.24195e-07	-0.130909	0.988706	-0.437826	0.440825	-1.27556	0.360997	-0.0783224	0.999804
329910	acyl-CoA thioesterase 11	Acot11	-5.32762	1.51692e-11	-1.36619	1.77395e-05	-3.03464	1.04541e-06	-0.436105	0.727038	0.560306	0.317449	0.0231864	0.988386	-0.11241	0.999804
16513	potassium inwardly-rectifying channel, subfamily J, member 10	Kcnj10	-4.28919	5.61893e-10	-1.82541	2.80389e-05	-4.63291	1.13604e-06	0.000473996	0.9996	-1.4167	0.0284956	-1.01997	0.415083	-0.0143692	0.999804
319229	secretin receptor	Sctr	-5.29217	3.51462e-11	-0.332982	0.0895727	1.32478	2.198e-06	0.448145	0.376191	0.416293	0.499573	-0.585658	0.63947	0.0960379	0.999804
105387	aldo-keto reductase family 1, member C14	Akr1c14	-5.07322	1.38149e-11	0.114073	0.593189	-2.55498	2.8969e-06	0.323366	0.795569	0.47296	0.385327	-0.582014	0.620894	-0.453231	0.999804
50909	complement component 1, r subcomponent A	C1ra	-5.74123	4.74324e-12	2.18758	1.6999e-12	-2.22531	2.9278e-06	-1.55434	1.64e-06	3.3484	6.42e-07	-1.54377	0.331165	-0.629125	0.999804
28250	solute carrier organic anion transporter family, member 1a4	Slco1a4	-6.81293	7.46141e-14	-0.955887	1.60449e-06	-1.26523	4.00009e-06	0.323724	0.480792	0.128792	0.830073	-0.0229184	0.987592	-0.372245	0.999804
18828	phospholipid scramblase 2	Plscr2	-4.49352	2.0484e-13	3.24952	1.67241e-16	0.918167	1.1521e-05	0.119347	0.961687	3.82182	4.41e-11	-0.622768	0.444429	-0.163583	0.999804
116847	proline arginine-rich end leucine-rich repeat	Prelp	-3.73783	1.66547e-09	-1.35386	0.000122441	-3.47679	1.16005e-05	-0.0260768	0.998865	-2.1924	0.00537983	-0.944419	0.441119	-0.0321546	0.999804
329065	stearoyl-coenzyme A desaturase 4	Scd4	-4.97317	3.29836e-11	-2.05701	5.59232e-08	-2.06179	2.12713e-05	0.114462	0.975652	-0.508365	0.428668	-1.36918	0.376185	-0.0572426	0.999804
100503868	predicted gene, 19935	Gm19935	-4.84677	1.50844e-10	-0.951321	0.000303296	-2.34589	2.18593e-05	0.190427	0.944681	-1.31842	0.0713578	-1.24678	0.407948	-0.910191	0.999804
268709	family with sequence similarity 107, member A	Fam107a	-3.86439	2.53475e-09	-1.49305	9.88146e-05	-3.12599	2.9425e-05	0.285388	0.943401	-1.06327	0.104507	-1.25115	0.39185	-0.142707	0.999804
14537	glucosaminyl (N-acetyl) transferase 1, core 2	Gcnt1	-6.20539	2.79059e-09	-1.6665	2.34694e-05	-2.95191	5.28149e-05	0.0803281	0.99173	0.250952	0.803789	0.879845	0.602618	0.597398	0.999804
22290	ubiquitously transcribed tetratricopeptide repeat gene, Y chromosome	Uty	-7.69273	4.07422e-12	0.412063	0.0112354	0.916868	6.14107e-05	-0.145042	0.956924	0.923627	0.228739	0.310515	0.85807	0.295334	0.999804
100043332	ankyrin repeat domain 66	Ankrd66	-5.08172	1.04852e-11	-1.50467	8.17715e-07	-1.60582	6.62148e-05	-0.0780895	0.982544	-0.459276	0.443935	-1.96775	0.236115	-0.565398	0.999804
117167	STEAP family member 4	Steap4	-6.21616	1.8248e-07	2.37522	5.83759e-07	1.91038	0.000234274	0.608972	0.807681	5.12528	1.75e-05	2.32934	0.336496	1.58235	0.999804
215772	androglobin	Adgb	-5.49763	1.79029e-10	0.00629386	0.979344	1.0099	0.00034275	0.116796	0.977377	1.56717	0.0158633	0.176031	0.918331	0.0898941	0.999804
12266	complement component 3	C3	-7.7328	2.34828e-08	1.94636	2.57808e-07	1.25752	0.000400215	-0.548904	0.727038	3.69368	0.00141933	0.153385	0.96416	-0.093228	0.999804
71738	MAM domain containing 2	Mamdc2	-3.62024	2.1665e-07	-0.8611	0.0163501	-3.19314	0.000410251	0.0509249	0.998865	-0.982521	0.235386	-0.950429	0.553638	0.186376	0.999804
78802	tetratricopeptide repeat domain 30A1	Ttc30a1	-1.319	0.0022569	-1.52413	0.00208555	-5.04122	0.000418997	0.184923	0.981405	-2.25979	0.00328107	-1.02217	0.408345	-0.232122	0.999804
12258	serine (or cysteine) peptidase inhibitor, clade G, member 1	Serping1	-5.04824	1.79847e-11	1.88832	6.63449e-11	-1.26625	0.000517012	-1.1319	0.000205001	2.55433	1.4e-05	0.281716	0.807413	0.0868491	0.999804
73667	RIKEN cDNA 2410004P03 gene	2410004P03Rik	-6.08406	8.79882e-13	-1.06023	6.35578e-06	-0.948146	0.000535846	-0.0875418	0.981405	0.536587	0.334055	-0.310859	0.804413	-0.0111236	0.999804
75172	coiled-coil domain containing 146	Ccdc146	-5.8066	8.32301e-10	-0.693631	0.00830539	-1.67956	0.000677359	0.312302	0.856305	2.1206	0.00457514	0.077783	0.969996	0.782163	0.999804
242037	ankrin repeat and ubiquitin domain containing 1	Ankub1	-6.33383	1.47218e-09	-1.36929	0.000141662	-1.86447	0.000685355	-0.00980272	0.998865	-0.890983	0.351543	0.396913	0.839052	0.009712	0.999804
100039484	predicted gene 2260	Gm2260	-5.03816	3.08532e-07	-1.6248	0.000766065	-3.03583	0.000738628	-0.0925802	0.994293	-1.72426	0.161184	-0.228157	0.929126	-0.458097	0.999804
70503	D-aspartate oxidase	Ddo	-4.9432	1.25347e-14	-1.25901	1.54737e-08	-0.692935	0.000776317	0.0443625	0.991224	-0.698808	0.082746	-0.292049	0.682915	-0.529706	0.999804
18595	platelet derived growth factor receptor, alpha polypeptide	Pdgfra	-0.836401	0.0355126	-4.58885	1.92763e-06	-2.87045	0.00121525	-0.282191	0.961974	-4.33738	3.68e-05	-0.774169	0.421878	0.11565	0.999804
14912	NK6 homeobox 2	Nkx6-2	-5.97984	6.25799e-10	0.941208	9.58964e-05	-1.47117	0.00134408	-0.0183946	0.998865	3.19979	6.96e-05	-1.02887	0.553154	0.0909311	0.999804
170442	butyrobetaine (gamma), 2-oxoglutarate dioxygenase 1 (gamma-butyrobetaine hydroxylase)	Bbox1	-5.37588	4.19181e-09	-1.45934	8.75781e-05	-1.68509	0.00144082	0.109304	0.982957	-0.477429	0.610871	-1.14458	0.54046	-1.261	0.999804
108096	solute carrier organic anion transporter family, member 1a5	Slco1a5	-4.75616	2.70993e-08	-1.05507	0.00287851	-2.06347	0.00153262	0.210825	0.961687	-0.87456	0.361018	-0.372304	0.85124	-0.034728	0.999804
74685	leucine rich repeat containing 74B	Lrrc74b	-6.2184	1.25446e-11	-1.00303	4.84344e-05	-1.03517	0.00181389	0.160594	0.951863	1.05004	0.104068	0.862498	0.493113	0.31472	0.999804
18830	phospholipid transfer protein	Pltp	-5.27475	1.68924e-16	0.0798454	0.502671	0.422475	0.00251013	-0.212058	0.727038	0.950355	0.000800429	-0.24762	0.647104	0.0996972	0.999804
20657	superoxide dismutase 3, extracellular	Sod3	-6.16269	4.52137e-14	-0.313996	0.020829	-0.612229	0.00255946	-0.0694099	0.979308	0.359219	0.459419	-0.326293	0.747122	-0.324344	0.999804
68859	small integral membrane protein 1	Smim1	-6.01245	1.3615e-09	-0.630395	0.0171076	-1.31161	0.00306357	-0.154178	0.969743	1.41	0.0754637	0.105373	0.961575	0.292503	0.999804
74918	IQ motif containing with AAA domain	Iqca	-5.53396	7.6282e-10	-0.482734	0.0587945	0.857411	0.00487121	0.0133043	0.998865	-0.132463	0.880924	0.27136	0.875918	0.27872	0.999804
70113	outer dense fiber of sperm tails 3B	Odf3b	-6.09121	2.11062e-07	-0.233673	0.514278	1.02523	0.0125885	0.312794	0.943401	1.31725	0.244384	0.42606	0.873028	-0.263162	0.999804
73712	dermokine	Dmkn	-6.03546	3.17844e-08	-0.840647	0.0171496	-1.39135	0.0145566	0.294716	0.932872	1.67304	0.0838128	0.0435406	0.987996	-0.333521	0.999804
68527	upper zone of growth plate and cartilage matrix associated	Ucma	-7.19673	1.15489e-09	-0.629513	0.0537452	-1.29734	0.0155558	0.420758	0.808702	1.36048	0.184215	1.19248	0.540991	0.68724	0.999804
69772	3-hydroxybutyrate dehydrogenase, type 2	Bdh2	-4.82538	9.80986e-13	-0.194535	0.21868	-0.57534	0.0169711	-0.0149139	0.998865	0.339934	0.452824	-0.828501	0.422266	-0.621066	0.999804
75563	dynein, axonemal, light intermediate polypeptide 1	Dnali1	-6.27046	5.21089e-14	-0.310513	0.0232639	-0.425636	0.0235814	0.182942	0.856305	1.15146	0.0143509	0.0529126	0.966332	0.291457	0.999804
50908	complement component 1, s subcomponent 1	C1s1	-5.03417	4.61622e-07	0.709911	0.0343962	-1.41785	0.0302443	-0.247497	0.963285	0.762746	0.458285	-0.815967	0.716751	-0.511577	0.999804
75465	dynein light chain roadblock-type 2	Dynlrb2	-5.53388	2.47106e-08	-0.350481	0.240043	-1.05457	0.0324415	0.350131	0.870666	0.0833973	0.936835	-0.165776	0.945461	-0.351224	0.999804
78600	phosphodiesterase 6H, cGMP-specific, cone, gamma	Pde6h	-4.34774	0.00327083	1.08367	0.125684	1.81533	0.0333543	-0.509507	0.970555	1.04246	0.575973	-0.150734	0.975016	-1.69762	0.999804
75472	cilia and flagella associated protein 126	Cfap126	-5.70244	9.27097e-13	-0.0745861	0.649392	-0.46648	0.0470071	0.243674	0.779005	1.40785	0.00582242	0.133077	0.918516	0.209103	0.999804
621239	NHL repeat containing 4	Nhlrc4	-6.04166	8.33772e-06	-1.90552	0.00722127	-1.85847	0.0495571	0.344832	0.961974	0.609584	0.705056	-0.399515	0.915897	-0.252987	0.999804
12623	carboxylesterase 1G	Ces1g	-4.09874	4.3347e-08	1.61402	1.73392e-06	-0.953525	0.0541396	0.313539	0.917474	4.36897	1.18e-07	-0.720705	0.623305	-1.26584	0.999804
12364	caspase 12	Casp12	-4.06823	3.34882e-10	2.18459	1.11017e-10	-0.628193	0.0596664	0.112862	0.979066	2.27599	2.75e-05	-0.583357	0.594579	-0.467037	0.999804
225845	phospholipase A and acyltransferase 3	Plaat3	-4.6712	3.8309e-13	1.42035	3.40755e-09	-0.384435	0.0741668	-0.00653878	0.998865	1.87206	1.52e-05	-0.4255	0.595994	-0.0173196	0.999804
71803	solute carrier family 25 (mitochondrial carrier), member 18	Slc25a18	-5.12806	1.55653e-14	-0.0320127	0.83096	0.249124	0.127655	0.267994	0.641675	0.421039	0.242856	-0.449433	0.55389	-0.102842	0.999804
56188	FXYD domain-containing ion transport regulator 1	Fxyd1	-5.35392	3.73865e-10	-0.100899	0.661574	0.384373	0.162412	0.14562	0.963503	0.888703	0.185471	-0.364373	0.815784	0.414256	0.999804
69387	DnaJ heat shock protein family (Hsp40) member B13	Dnajb13	-5.98365	4.86957e-12	-0.00795525	0.967373	0.279553	0.19863	0.144654	0.961256	2.10758	0.000434575	0.721041	0.525437	0.166201	0.999804
75718	von Willebrand factor A domain containing 5B1	Vwa5b1	-5.79131	3.72225e-11	-0.504386	0.027527	-0.359498	0.202529	-0.155236	0.961974	0.889531	0.161895	0.494984	0.69201	-0.127806	0.999804
17153	myelin and lymphocyte protein, T cell differentiation protein	Mal	-4.92318	3.25215e-07	-0.617171	0.0988787	-0.696137	0.204093	0.427082	0.861701	0.0965868	0.929379	0.329497	0.884958	-1.56209	0.999804
71660	retinoic acid receptor responder (tazarotene induced) 2	Rarres2	-5.56088	4.90393e-13	0.392964	0.0102189	0.223951	0.254849	-0.0692855	0.982544	1.38645	0.00389397	0.667919	0.473475	0.0362485	0.999804
73472	spermatogenesis associated 18	Spata18	-5.35729	6.44064e-10	-0.241349	0.318093	0.350722	0.257559	0.0346881	0.998865	0.00538402	0.99528	-0.191614	0.916755	-0.37155	0.999804
333670	predicted gene 867	Gm867	-6.14923	5.46577e-11	-0.647504	0.00498426	-0.322546	0.281181	-0.0258156	0.998865	0.661081	0.36154	-0.888076	0.558243	0.325122	0.999804
237930	tubulin tyrosine ligase-like family, member 6	Ttll6	-6.64003	7.45032e-12	-0.470228	0.0134373	-0.263748	0.303496	0.109464	0.968145	1.28465	0.0526799	0.524531	0.696595	-0.46782	0.999804
381260	predicted gene 973	Gm973	-5.14167	5.2606e-12	-1.13809	1.15555e-05	-0.243683	0.320408	0.0546293	0.994208	0.501638	0.327735	-0.368933	0.733176	-0.236769	0.999804
330721	NIMA (never in mitosis gene a)-related expressed kinase 5	Nek5	-5.2066	1.36258e-10	0.65718	0.00161044	0.258187	0.34973	0.278292	0.856305	0.815608	0.19136	-0.734627	0.586515	-0.273697	0.999804
16803	lipopolysaccharide binding protein	Lbp	-5.45796	6.36413e-08	0.171523	0.592861	-0.425278	0.374431	-0.352616	0.917909	1.17046	0.216317	0.0646641	0.979964	-0.311918	0.999804
15186	histidine decarboxylase	Hdc	-5.77217	1.19364e-07	0.816991	0.00736235	-0.349886	0.472847	0.220592	0.961974	4.98906	5.19e-06	0.00362942	0.998662	-0.542303	0.999804
270150	coiled-coil domain containing 153	Ccdc153	-7.02569	6.54035e-10	-1.21031	6.47029e-05	-0.207692	0.512905	0.290209	0.85829	-0.441152	0.686571	-0.6152	0.776191	-0.0414763	0.999804
208613	transmembrane protein 212	Tmem212	-4.97239	3.21839e-08	-0.336988	0.31575	0.267836	0.537525	0.0410302	0.998865	-0.777501	0.403299	-0.977791	0.574142	-1.45689	0.999804
20592	lysine (K)-specific demethylase 5D	Kdm5d	-7.80485	1.62075e-14	-0.328715	0.00966106	-0.0747324	0.631542	-0.0630288	0.981405	-0.171331	0.789288	-0.870193	0.483338	-1.58843	0.999804
234964	deuterosome assembly protein 1	Deup1	-5.1306	4.93318e-11	-0.48673	0.0199475	0.0905409	0.745862	0.406093	0.541963	0.248465	0.694915	-1.28463	0.39185	-1.45877	0.999804
242253	WD repeat domain 63	Wdr63	-5.24221	2.53336e-08	-0.309817	0.296516	0.122197	0.763497	0.246903	0.955456	1.1012	0.192005	-0.244715	0.912636	-0.124758	0.999804
436062	family with sequence similarity 92, member B	Fam92b	-5.30443	1.72172e-06	-1.02601	0.0243392	-0.046088	0.940706	0.10199	0.994495	-0.371454	0.784351	-0.83963	0.747337	-1.75602	0.999804
633979	adenylate kinase 9	Ak9	-5.28729	2.83832e-11	-0.56617	0.00696684	0.0202494	0.943468	0.172923	0.946533	0.749502	0.195485	0.18318	0.896532	-0.335766	0.999804

## Sheet: highly_variable_band2
entrezid	genename	symbol	resting_immature_v_mature_logfc	resting_immature_v_mature_P.adj	mature_ifn_sfv_v_resting_logfc	mature_ifn_sfv_v_resting_P.adj	mature_sfv_v_resting_logfc	mature_sfv_v_resting_P.adj	mature_ifn_v_resting_logfc	mature_ifn_v_resting_P.adj	immature_ifn_sfv_v_resting_logfc	immature_ifn_sfv_v_resting_P.adj	immature_sfv_v_resting_logfc	immature_sfv_v_resting_P.adj	immature_ifn_v_resting_logfc	immature_ifn_v_resting_P.adj
27528	neuronal regeneration related protein	Nrep	2.99107	7.62019e-19	-2.38542	7.07967e-15	-1.28452	7.4189e-09	0.199168	0.591493	-0.999367	5.52e-11	0.0422933	0.772325	-0.0420224	0.999804
235402	leucine rich repeat and Ig domain containing 1	Lingo1	1.27817	2.73254e-09	-3.09971	1.0778e-11	-2.9865	3.36784e-08	-0.0405822	0.994994	-1.00934	6.85e-07	-0.296688	0.331602	0.0639434	0.999804
215654	cadherin 12	Cdh12	7.06783	5.88653e-06	0.958372	0.584984	8.87871	6.96247e-07	-0.0532218	0.998865	0.066352	0.883619	0.348935	0.642284	-0.0300979	0.999804
223604	potassium channel, subfamily K, member 9	Kcnk9	5.96706	4.8648e-14	1.43279	0.00117252	2.74715	2.49543e-06	-0.608509	0.895498	0.544128	0.000570936	0.388783	0.253387	0.125489	0.999804
70433	dorsal inhibitory axon guidance protein	Draxin	0.878538	0.000268817	-3.96224	1.56185e-08	-4.15826	5.90281e-06	-0.176306	0.961974	-1.96993	3.87e-07	-0.29325	0.491538	0.0264889	0.999804
74189	phosphatase and actin regulator 3	Phactr3	2.05918	3.05714e-12	-2.98923	7.05955e-10	-2.02484	9.49824e-06	0.0451044	0.994994	-0.700854	3.35e-05	-0.0374091	0.902354	0.0615827	0.999804
269615	phospholipase C, eta 2	Plch2	4.72611	3.86885e-13	0.900933	0.02006	2.25765	1.3387e-05	-0.152475	0.991153	-0.0206855	0.897106	0.157995	0.559237	0.201489	0.999804
15551	5-hydroxytryptamine (serotonin) receptor 1B	Htr1b	6.03234	9.5153e-08	0.627038	0.582274	4.26257	0.000179893	0.156884	0.998865	-0.726593	0.0597807	-0.110267	0.890558	0.169544	0.999804
18013	neurogenic differentiation 2	Neurod2	7.06044	6.97739e-12	-0.0320298	0.971199	2.91498	0.000312787	-0.615991	0.961687	-1.06315	2.67e-05	-0.398282	0.346169	-0.00476303	0.999804
19218	prostaglandin E receptor 3 (subtype EP3)	Ptger3	5.1452	1.06627e-10	2.78451	1.1163e-05	2.49558	0.000396714	-0.876558	0.883838	-0.261685	0.21933	-0.0344823	0.944692	-0.0024575	0.999804
212712	special AT-rich sequence binding protein 2	Satb2	7.49967	4.52778e-11	5.37509	3.56819e-08	3.04049	0.000824584	-0.360213	0.989811	-1.38029	2.3e-05	-0.23914	0.600468	-0.0675746	0.999804
24117	Wnt inhibitory factor 1	Wif1	4.07929	1.56352e-08	-1.89683	0.0178052	2.40533	0.000876962	-1.92377	0.435303	-0.557286	0.0673905	0.352548	0.488865	-0.0176995	0.999804
268595	RIKEN cDNA D430019H16 gene	D430019H16Rik	2.55072	9.32122e-12	-2.94011	1.85568e-08	-1.38207	0.00106618	-0.0885676	0.989811	-1.34204	6.38e-07	-0.189829	0.565853	0.090592	0.999804
110886	gamma-aminobutyric acid (GABA) A receptor, subunit alpha 5	Gabra5	3.52284	6.44513e-17	-1.32687	8.17785e-07	-0.994252	0.00109011	0.174476	0.914621	-0.801683	1.45e-07	0.0231185	0.919852	-0.044887	0.999804
23859	discs large MAGUK scaffold protein 2	Dlg2	5.13195	5.59677e-15	1.65164	5.27425e-06	1.30652	0.00138699	-0.179633	0.978614	0.151412	0.347544	0.202553	0.511297	0.0129816	0.999804
72961	solute carrier family 17 (sodium-dependent inorganic phosphate cotransporter), member 7	Slc17a7	5.29795	9.13367e-11	0.000325498	0.999661	2.19206	0.00205519	0.206265	0.991775	-0.521825	0.0197002	0.0922416	0.823812	0.0112318	0.999804
238205	leucine rich repeat and fibronectin type III domain containing 5	Lrfn5	6.33992	3.18939e-14	1.10383	0.013867	1.71496	0.00209446	-0.127066	0.995273	-0.364922	0.0128238	-0.0611647	0.835832	-0.0716252	0.999804
230085	PHD finger protein 24	Phf24	3.89801	1.05965e-11	-1.12598	0.0184778	1.43571	0.00214995	-0.691784	0.778398	-0.530272	0.0185416	0.216637	0.581273	0.146178	0.999804
21367	contactin 2	Cntn2	4.60141	4.00228e-15	-0.818928	0.0168232	1.12187	0.00242585	-0.426911	0.85829	-1.40609	5.74e-09	0.41234	0.184156	0.154531	0.999804
237010	kelch-like 4	Klhl4	7.12536	4.06591e-11	0.280847	0.754483	2.60636	0.00313848	-0.410988	0.981405	-0.996812	9.33e-05	-0.0222971	0.96307	-0.0332154	0.999804
64706	signal peptide, CUB domain, EGF-like 1	Scube1	5.22593	6.12484e-13	0.210189	0.668901	1.61279	0.00318133	0.237534	0.981405	-0.239145	0.138385	0.399767	0.267815	0.207169	0.999804
23805	adenomatosis polyposis coli 2	Apc2	2.25757	1.86454e-06	-2.04345	0.00032613	-2.34478	0.00377113	-0.427787	0.943401	-1.16345	0.00307874	-0.440131	0.517372	0.21535	0.999804
12854	cortistatin	Cort	6.59741	7.40146e-09	1.15669	0.262057	3.10155	0.00426766	1.00115	0.946029	0.77991	0.0176498	0.0457909	0.955657	-0.000898984	0.999804
64011	neurogranin	Nrgn	4.77723	3.77377e-09	0.269785	0.723284	2.213	0.00461108	0.472062	0.964336	-0.0709071	0.792897	0.359943	0.449717	0.164627	0.999804
270109	pecanex homolog 2	Pcnx2	4.34859	1.55664e-09	-0.483342	0.476804	1.86455	0.00675924	-0.442337	0.964398	-0.197736	0.419662	0.104494	0.829741	-0.0953004	0.999804
14421	beta-1,4-N-acetyl-galactosaminyl transferase 1	B4galnt1	3.07102	2.09006e-13	-1.78818	8.19868e-06	-1.18061	0.00734697	-0.0954689	0.988706	-0.731428	4.25e-05	-0.0341887	0.917067	0.0694171	0.999804
16728	L1 cell adhesion molecule	L1cam	4.79089	1.11556e-13	-1.43969	0.00333087	1.20062	0.00742918	-0.44006	0.906876	-0.424513	0.0294161	0.0392145	0.929656	0.130322	0.999804
241794	potassium voltage-gated channel, subfamily G, member 1	Kcng1	5.09608	7.49834e-11	-0.209465	0.757206	1.76547	0.00860239	0.494035	0.961687	-1.4312	1.32e-05	-0.318427	0.447426	-0.154457	0.999804
56471	stathmin-like 4	Stmn4	3.79637	2.67639e-16	-1.93057	9.50288e-08	-0.838677	0.00862903	-0.0182997	0.998865	-0.793171	2.08e-06	0.00239433	0.993591	-0.0459885	0.999804
69908	RAB3B, member RAS oncogene family	Rab3b	4.65914	1.01347e-11	0.122524	0.819321	1.46094	0.0105131	-0.0475021	0.998865	-0.446055	0.021629	0.161831	0.627766	-0.0153413	0.999804
208890	solute carrier family 26, member 7	Slc26a7	4.60323	3.56214e-07	2.75405	0.000903366	2.42767	0.0114357	-0.37472	0.989811	1.36687	0.000103427	0.682281	0.331979	-0.00250974	0.999804
381489	relaxin/insulin-like family peptide receptor 1	Rxfp1	5.23616	1.55199e-08	0.622382	0.466688	2.28379	0.0119153	-0.107961	0.998865	1.26305	5.08e-05	0.23099	0.664271	-0.0477864	0.999804
65079	reticulon 4 receptor	Rtn4r	3.37958	4.22494e-08	-2.52425	0.00456008	-2.88584	0.0132773	-0.0715337	0.998865	-1.78646	4.34e-05	-0.694034	0.307863	0.0551932	0.999804
12404	cerebellin 1 precursor protein	Cbln1	2.16306	7.75777e-07	-3.47557	5.946e-05	-2.05716	0.0158514	-0.204279	0.981405	-2.12007	8.64e-06	-0.271415	0.596452	0.0510176	0.999804
11989	solute carrier family 7 (cationic amino acid transporter, y+ system), member 3	Slc7a3	4.69377	3.7432e-13	0.773777	0.0394157	1.162	0.0161517	0.132789	0.99162	-0.0935713	0.590469	0.0804987	0.817942	0.0629061	0.999804
94253	HECT, C2 and WW domain containing E3 ubiquitin protein ligase 1	Hecw1	5.28507	5.50504e-15	-0.850229	0.0342794	1.02566	0.016234	-0.381146	0.926062	-0.28792	0.0502965	0.00255764	0.99453	0.18316	0.999804
319807	NACHT and WD repeat domain containing 2	Nwd2	6.978	2.2028e-13	-0.736651	0.27306	1.58653	0.0185488	0.0414794	0.998865	-1.48259	5.85e-08	-0.140094	0.639691	-0.170802	0.999804
22152	tubulin, beta 3 class III	Tubb3	3.2572	5.07935e-10	-2.30904	3.35991e-05	-1.33901	0.0198786	0.048263	0.998865	-1.57421	2.53e-05	-0.638867	0.322118	0.011436	0.999804
74342	leucine rich repeat transmembrane neuronal 1	Lrrtm1	2.03777	0.00015332	-1.83545	0.0212253	-3.98411	0.020073	-0.200716	0.99162	-1.62708	0.00218389	-0.791431	0.392187	-0.0274891	0.999804
225392	RELT-like 2	Rell2	4.71749	3.68253e-13	-0.475493	0.280017	1.12306	0.0219005	0.565398	0.822483	-0.253893	0.11952	0.161127	0.585638	0.00532907	0.999804
68235	maturin, neural progenitor differentiation regulator homolog (Xenopus)	Mturn	3.32266	6.80163e-17	-1.57677	1.23518e-08	-0.503005	0.0235705	-0.0448875	0.993497	-1.20645	8.14e-10	0.145272	0.460931	-0.0172492	0.999804
13638	ephrin A3	Efna3	2.72087	1.11073e-08	-1.92694	0.00149159	-1.773	0.0242038	-0.184828	0.982544	-1.00204	0.000744812	-0.329527	0.487997	-0.0651418	0.999804
20604	somatostatin	Sst	4.37884	8.38211e-10	0.455744	0.427029	1.47978	0.0270352	0.0627068	0.998865	0.631187	0.0170603	-0.244527	0.63058	-0.242301	0.999804
15572	ELAV like RNA binding protein 4	Elavl4	3.0559	1.39275e-10	-2.52437	6.4459e-05	-1.45875	0.0279517	0.0227381	0.998865	-0.8807	0.000462297	0.0411612	0.934135	0.0884878	0.999804
18389	opioid receptor-like 1	Oprl1	1.6048	0.000314813	-3.68385	0.000316927	-2.35213	0.0280302	-0.149376	0.993497	-1.80981	0.000464963	-0.32025	0.648069	0.187433	0.999804
20257	stathmin-like 2	Stmn2	5.55184	1.38986e-17	-1.06628	0.000471989	0.647023	0.0310916	0.102326	0.982544	-0.670567	2.85e-05	0.0909581	0.704649	-0.057255	0.999804
140904	calneuron 1	Caln1	4.87007	1.38986e-17	-0.173524	0.441923	0.584049	0.036116	-0.0108238	0.998865	-0.147882	0.12826	0.183258	0.376185	0.0479372	0.999804
22368	transient receptor potential cation channel, subfamily V, member 2	Trpv2	5.03381	5.15786e-09	-0.962554	0.272248	1.70675	0.0418376	-0.246792	0.993497	-0.688716	0.02193	-0.303802	0.557539	0.231448	0.999804
16826	LIM domain binding 2	Ldb2	3.80389	3.62621e-10	-1.82994	0.00631178	-1.75873	0.0446008	0.345739	0.961687	-0.189307	0.404567	0.212437	0.596266	0.00477929	0.999804
636808	contactin associated protein-like 5A	Cntnap5a	4.56198	2.1271e-07	2.68217	0.000762689	1.89947	0.0459507	-0.319289	0.991596	1.03113	0.00134814	0.554175	0.388018	0.128515	0.999804
14738	G-protein coupled receptor 12	Gpr12	2.95539	8.10555e-08	-3.06724	0.000743345	-1.90956	0.0472244	-0.126014	0.998051	-2.04139	1.52e-05	-0.317628	0.553638	0.000484588	0.999804
13426	dynein cytoplasmic 1 intermediate chain 1	Dync1i1	3.84926	1.58157e-15	-0.828986	0.00270097	0.574982	0.0513767	-0.128864	0.977942	-0.531168	0.000145136	0.0487783	0.841581	-0.0659392	0.999804
246313	prokineticin receptor 2	Prokr2	2.41853	3.96266e-05	-3.95579	0.00240674	-2.8294	0.0526937	-0.116043	0.998865	-2.30767	0.000249331	-0.717751	0.415083	-0.0405984	0.999804
71691	PNMA-like 1	Pnmal1	2.81346	1.87002e-07	-2.4987	0.00182839	-1.94002	0.0531171	0.179953	0.990331	-1.6637	0.000131445	-0.54246	0.422693	-0.0151065	0.999804
387285	hypocretin (orexin) receptor 2	Hcrtr2	7.30279	9.22585e-09	0.393724	0.755717	2.29034	0.0559087	0.609351	0.981405	-1.29609	0.000503849	0.0580983	0.927665	-0.022655	0.999804
60596	guanylate cyclase 1, soluble, alpha 1	Gucy1a1	4.02982	1.50606e-10	-2.57659	0.000904155	-1.74001	0.0591352	-0.394075	0.961687	-0.85304	0.00463796	-0.36066	0.503276	0.0297314	0.999804
241732	TSPY-like 3	Tspyl3	2.76969	7.069e-08	-2.11689	0.00278947	-1.5965	0.0635657	-0.0460462	0.998865	-1.23844	0.000431567	-0.478694	0.408345	-0.197196	0.999804
72413	potassium large conductance calcium-activated channel, subfamily M, beta member 2	Kcnmb2	5.5964	3.82479e-06	-0.754494	0.603363	2.46004	0.0680668	0.507673	0.989811	0.4923	0.232534	-0.24958	0.782593	-0.205385	0.999804
100041735	predicted gene, 3488	Gm3488	4.98214	6.99132e-10	3.21212	3.843e-06	1.37916	0.0700234	0.21732	0.991775	-0.301391	0.215509	0.0104073	0.986534	-0.148108	0.999804
239405	R-spondin 2	Rspo2	5.32949	2.99149e-07	-0.237637	0.845913	1.99012	0.078595	0.543241	0.979308	-1.70031	0.000446484	-0.365159	0.582695	-0.00017777	0.999804
64450	G protein-coupled receptor 85	Gpr85	3.22594	7.14746e-07	-2.0915	0.0188789	-2.46861	0.0799533	0.0152701	0.998865	-1.44517	0.00208578	-0.723436	0.398767	-0.0631382	0.999804
19418	RAS protein-specific guanine nucleotide-releasing factor 2	Rasgrf2	3.29584	4.5324e-11	-0.956374	0.0236368	-1.08206	0.0815209	-0.456082	0.897203	-1.14782	3.12e-05	-0.278381	0.487997	0.18093	0.999804
14406	gamma-aminobutyric acid (GABA) A receptor, subunit gamma 2	Gabrg2	3.21316	7.75093e-12	-1.90516	8.94824e-05	-0.889987	0.0817487	-0.15999	0.981405	-0.851335	0.000228714	-0.217277	0.550273	-0.0307425	0.999804
19142	protease, serine 12 neurotrypsin (motopsin)	Prss12	5.39797	3.07842e-11	0.126935	0.85128	1.2074	0.0823677	-0.244026	0.989922	-1.4365	3.47e-06	0.101081	0.795793	0.0919456	0.999804
225266	kelch-like 14	Klhl14	6.41516	3.85125e-06	0.041164	0.981861	2.53792	0.0991057	-0.597415	0.990331	-2.22022	0.00109691	-0.286629	0.751638	0.219823	0.999804
192163	protocadherin alpha 3	Pcdha3	3.42367	2.84453e-09	-2.08436	0.00375108	-1.32937	0.108572	0.154211	0.991945	-1.22004	0.000173475	-0.29392	0.532939	-0.0436448	0.999804
208666	DIRAS family, GTP-binding RAS-like 1	Diras1	3.82271	2.21243e-10	-1.85313	0.00536986	-1.26853	0.115396	0.190467	0.986018	-1.24085	5.63e-05	-0.163641	0.711753	0.192765	0.999804
13829	dematin actin binding protein	Dmtn	4.01102	6.5576e-12	-0.877319	0.0566847	-1.04721	0.116569	0.0556229	0.998865	-0.867421	0.000284289	-0.205567	0.579065	-0.111293	0.999804
268354	TAFA chemokine like family member 2	Tafa2	4.7141	3.25248e-16	-1.39888	0.00014962	0.520097	0.117838	-0.381114	0.851451	-1.12691	1.99e-08	0.0757884	0.736082	-0.0560081	0.999804
64378	G-protein coupled receptor 88	Gpr88	4.57944	1.95637e-09	-1.40113	0.0885744	-1.81498	0.12894	-0.2989	0.982544	-0.391865	0.163371	-0.463662	0.420463	0.250015	0.999804
329502	phospholipase A2, group IVE	Pla2g4e	5.84602	1.36178e-08	1.35633	0.123424	1.57813	0.133915	-1.09054	0.937581	-0.759399	0.0171833	-0.129192	0.825795	-0.0544873	0.999804
20981	synaptotagmin III	Syt3	2.91219	3.16002e-08	-1.61925	0.0108593	-1.15319	0.141375	0.0353255	0.998865	-1.03667	0.00118905	0.0694954	0.905406	0.208555	0.999804
16874	LIM homeobox protein 6	Lhx6	4.34941	1.39781e-10	-1.15313	0.0707946	0.94627	0.142274	-0.038021	0.998865	-1.47796	8.59e-06	0.214173	0.591488	0.39957	0.999804
235604	CaM kinase-like vesicle-associated	Camkv	4.93105	5.44665e-13	-0.856971	0.0774568	0.772537	0.143848	-0.195783	0.982544	-0.339697	0.095337	0.144713	0.705278	-0.0353323	0.999804
23963	teneurin transmembrane protein 1	Tenm1	5.04214	1.13088e-14	0.112041	0.762885	0.640197	0.146785	-0.368204	0.932872	0.172396	0.237535	0.102554	0.717548	0.14877	0.999804
17933	myelin transcription factor 1-like	Myt1l	3.58318	1.50246e-13	-0.927969	0.00397852	-0.597089	0.150784	-0.246359	0.951875	-0.15258	0.368524	0.191472	0.543164	-0.00768948	0.999804
14617	gap junction protein, delta 2	Gjd2	2.62241	6.00938e-07	-3.87305	0.00019675	-1.21782	0.152592	-0.00838334	0.998865	-1.53677	0.000249471	-0.348448	0.541946	-0.0679856	0.999804
554327	RIKEN cDNA 2610042L04 gene	2610042L04Rik	5.6853	3.27571e-07	3.81281	0.000213338	1.71532	0.160939	0.502315	0.982544	-0.824194	0.0386913	-0.737681	0.376185	-0.638604	0.999804
14704	guanine nucleotide binding protein (G protein), gamma 3	Gng3	4.14736	1.16046e-14	-0.577404	0.056119	0.498736	0.164286	0.160589	0.973265	-0.420948	0.00737352	0.079978	0.790856	-0.0617394	0.999804
20452	ST8 alpha-N-acetyl-neuraminide alpha-2,8-sialyltransferase 4	St8sia4	2.99476	1.31247e-07	-1.83798	0.0121444	-1.28692	0.170172	0.182722	0.991153	-1.23724	0.00119536	-0.374164	0.539685	0.0036408	0.999804
76071	janus kinase and microtubule interacting protein 1	Jakmip1	3.79769	1.55571e-14	-1.63789	5.24568e-05	-0.545109	0.17517	-0.137363	0.981405	-0.817526	5.63e-06	-0.159362	0.518754	-0.143215	0.999804
13842	Eph receptor A8	Epha8	4.32904	9.31774e-10	-0.406313	0.536812	0.936144	0.186267	-0.518578	0.961687	0.491053	0.027879	0.19224	0.647913	0.122191	0.999804
64176	synaptic vesicle glycoprotein 2 b	Sv2b	4.36652	6.49653e-09	-0.290267	0.701453	1.03227	0.191631	0.0461831	0.998865	-0.469727	0.0895058	-0.0919005	0.874495	-0.133101	0.999804
319642	RAB9B, member RAS oncogene family	Rab9b	3.78937	9.904e-10	-2.09951	0.0050693	-1.09646	0.19653	-0.0824162	0.998865	-1.51686	2.02e-05	-0.35417	0.464448	-0.0973626	0.999804
18707	phosphatidylinositol-4,5-bisphosphate 3-kinase catalytic subunit delta	Pik3cd	3.92998	1.74478e-10	-0.456594	0.389306	0.775061	0.198767	-0.414258	0.961687	-0.638988	0.0067617	0.0483863	0.922309	0.0578843	0.999804
237387	leucine rich repeat containing 3	Lrrc3	3.56753	8.03134e-10	-1.98515	0.00370733	-0.959832	0.204354	0.22317	0.981405	-1.44802	1.84e-05	-0.239408	0.574142	0.0692704	0.999804
110876	sodium channel, voltage-gated, type II, alpha	Scn2a	3.10784	1.32982e-10	-1.29367	0.00368136	-0.705913	0.204461	0.101871	0.99369	-0.425839	0.0641871	-0.012136	0.982553	0.0826327	0.999804
18216	neurotensin receptor 1	Ntsr1	7.11658	2.37114e-07	-0.31569	0.848284	1.84169	0.223731	0.802433	0.975393	-1.90085	0.000124105	-0.428653	0.514626	0.182892	0.999804
20983	synaptotagmin IV	Syt4	5.44825	1.479e-11	0.245253	0.676026	0.841289	0.227779	0.0668061	0.998865	-1.46151	5.89e-05	-0.461893	0.423859	-0.0677312	0.999804
381413	G protein-coupled receptor 176	Gpr176	3.81995	6.5625e-08	-1.55534	0.0609574	0.948751	0.230904	-0.817311	0.917909	-0.508683	0.104507	-0.281236	0.61231	-0.112723	0.999804
320563	immunoglobulin superfamily containing leucine-rich repeat 2	Islr2	3.95094	1.12676e-13	-0.816768	0.0126031	-0.52099	0.231265	-0.17264	0.973838	-1.31202	1.32e-06	-0.296733	0.427186	0.0449005	0.999804
68566	calcyon neuron-specific vesicular protein	Caly	3.95189	3.12429e-13	-1.09285	0.00656514	0.500951	0.236299	0.0742311	0.998501	-0.36461	0.0328694	-0.0491625	0.897734	-0.0219521	0.999804
74100	cyclic AMP-regulated phosphoprotein, 21	Arpp21	4.06845	1.23775e-12	-1.25615	0.0068562	0.538645	0.256761	-0.282418	0.961687	0.099601	0.592711	-0.00707424	0.988386	-0.215644	0.999804
20617	synuclein, alpha	Snca	4.68534	1.42615e-15	-0.599622	0.054929	0.4194	0.259823	0.435203	0.77884	-0.110162	0.371075	0.0780284	0.744725	-0.066234	0.999804
270049	UDP-N-acetyl-alpha-D-galactosamine:polypeptide N-acetylgalactosaminyltransferase-like 6	Galntl6	3.85276	1.40771e-08	-1.20717	0.0966341	0.825854	0.264356	-0.947154	0.85829	0.326956	0.198254	0.443698	0.39185	-0.157934	0.999804
71780	myo-inositol 1-phosphate synthase A1	Isyna1	4.29978	1.06696e-10	-0.091779	0.87564	0.689446	0.288543	0.363368	0.961974	-0.853985	0.00080241	-0.276791	0.503276	-0.00771626	0.999804
107684	coronin, actin binding protein 2A	Coro2a	5.50795	2.45762e-08	-1.54016	0.175664	1.13709	0.290888	-0.312109	0.992069	-0.715874	0.024274	0.0733106	0.914191	0.117001	0.999804
212518	shadow of prion protein	Sprn	4.39279	1.0329e-08	-2.441	0.016976	-1.13486	0.303886	-0.508399	0.964336	-1.07634	0.00155707	-0.287571	0.586515	-0.104468	0.999804
238680	contactin associated protein-like 3	Cntnap3	3.31337	9.19345e-09	-1.39837	0.0291646	-0.795573	0.31002	-0.395421	0.961974	-0.307477	0.235486	0.0310353	0.958889	0.192007	0.999804
18232	neurexophilin 2	Nxph2	6.13981	5.72122e-06	-0.571704	0.749252	1.6777	0.314241	-1.13066	0.968145	-2.31507	0.000546577	-0.658996	0.464232	-0.0965	0.999804
114255	docking protein 4	Dok4	3.98169	4.41686e-12	-0.0578245	0.894242	-0.595276	0.327165	0.500171	0.85829	-1.63039	3.16e-07	-0.0157009	0.972719	0.334753	0.999804
54376	calcium channel, voltage-dependent, gamma subunit 3	Cacng3	3.70828	1.48793e-10	-1.30851	0.0185449	0.558015	0.327715	-0.0388351	0.998865	-0.107039	0.606429	-0.113361	0.780208	0.00916583	0.999804
73010	G protein-coupled receptor 22	Gpr22	4.29272	1.49389e-07	-0.698189	0.442806	0.93107	0.329951	0.0921467	0.998865	-0.328777	0.329343	-0.05088	0.94848	0.101998	0.999804
12941	protocadherin alpha 5	Pcdha5	3.64851	2.89885e-12	-2.0146	0.000200366	-0.515341	0.330219	0.17427	0.981405	-1.00476	1.52e-05	-0.356683	0.336496	-0.16948	0.999804
14394	gamma-aminobutyric acid (GABA) A receptor, subunit alpha 1	Gabra1	3.89764	4.19177e-08	-0.863964	0.263636	-1.05681	0.330657	0.836929	0.858526	-1.02681	0.00338527	-0.180138	0.761302	-0.0888315	0.999804
54195	guanylate cyclase 1, soluble, beta 1	Gucy1b1	3.5454	7.10875e-16	-1.77455	2.27194e-07	0.243502	0.331019	0.246355	0.858526	-0.442193	0.000972659	-0.0454428	0.862163	-0.0136713	0.999804
215303	calcium/calmodulin-dependent protein kinase I gamma	Camk1g	3.17089	1.7541e-08	-1.85589	0.00793471	-0.793591	0.33132	-0.446427	0.961687	-1.01222	0.0016446	-0.384476	0.473475	-0.00323488	0.999804
81906	cytochrome P450, family 4, subfamily x, polypeptide 1	Cyp4x1	5.98171	9.34092e-11	-0.0429747	0.959895	0.827143	0.332651	-0.397218	0.981405	-0.484016	0.0284773	-0.0290831	0.953175	0.0606128	0.999804
211134	leucine zipper, putative tumor suppressor 1	Lzts1	3.34304	3.49532e-09	-1.00066	0.0780382	-0.756818	0.334776	0.306634	0.966609	-1.31163	0.000114417	-0.251889	0.596452	-0.013925	0.999804
12921	corticotropin releasing hormone receptor 1	Crhr1	4.12211	2.20969e-07	0.2409	0.776293	0.915476	0.334821	0.135799	0.998865	0.981491	0.00178421	0.385142	0.509391	0.0120676	0.999804
15550	5-hydroxytryptamine (serotonin) receptor 1A	Htr1a	5.39824	5.18398e-06	2.50604	0.0274313	1.38358	0.335579	-1.08315	0.961974	-2.10818	0.00161923	-0.510792	0.565132	-0.0289152	0.999804
12942	protocadherin alpha 11	Pcdha11	3.0067	0.000213364	-1.55909	0.202328	-1.73412	0.33584	-0.111747	0.998865	-2.04426	0.00457514	-0.546532	0.602618	-0.354282	0.999804
20745	sparc/osteonectin, cwcv and kazal-like domains proteoglycan 1	Spock1	4.8659	3.91921e-12	-0.621477	0.245627	0.596036	0.341793	-0.352016	0.961974	-0.58252	0.00567939	0.477109	0.274519	0.120989	0.999804
20451	ST8 alpha-N-acetyl-neuraminide alpha-2,8-sialyltransferase 3	St8sia3	4.9012	1.51033e-09	-1.918	0.042266	-1.10772	0.343055	-0.56663	0.961687	-1.02345	0.00215364	-0.338847	0.544539	-0.0650718	0.999804
140919	solute carrier family 17 (sodium-dependent inorganic phosphate cotransporter), member 6	Slc17a6	5.19865	1.1385e-10	-1.64631	0.042093	0.730826	0.349322	0.777433	0.866067	-1.27993	2.96e-05	-0.189546	0.646039	0.0713176	0.999804
102278	copine VII	Cpne7	3.63718	7.14376e-07	0.0478526	0.955901	0.828272	0.358804	-1.52427	0.757433	0.936498	0.00390791	0.358312	0.552683	0.0413382	0.999804
239336	relaxin family peptide receptor 3	Rxfp3	4.95759	2.40547e-06	-0.784294	0.54646	1.16777	0.365131	-0.461707	0.990002	-2.30753	0.00052752	-0.348064	0.669945	-0.0613631	0.999804
237213	glycine receptor, alpha 2 subunit	Glra2	3.08529	8.09867e-12	-2.56812	8.55151e-06	-0.421318	0.369195	0.0296543	0.998865	-0.927304	3.46e-05	-0.0251007	0.94975	-0.0385343	0.999804
18166	neuropeptide Y receptor Y1	Npy1r	4.0041	6.78942e-06	-0.920032	0.425073	-1.50666	0.37495	0.425902	0.982544	-2.19972	0.000601159	-0.457939	0.581489	0.0250515	0.999804
72685	DnaJ heat shock protein family (Hsp40) member C6	Dnajc6	3.4833	1.00341e-11	-1.01622	0.0140919	-0.470243	0.38453	0.125765	0.990331	-1.39635	2.6e-06	-0.205253	0.583444	0.105561	0.999804
381310	mechanosensory transduction mediator	Stum	4.40139	1.74917e-12	1.2513	0.00152862	0.467447	0.393536	-0.0198886	0.998865	-0.317867	0.0805068	0.0764754	0.83879	0.402213	0.999804
381634	predicted gene 1043	Gm1043	4.13263	2.39815e-11	-0.562391	0.262952	0.484371	0.405383	-0.403284	0.961687	0.550107	0.00383883	0.0388881	0.929441	0.000206015	0.999804
114301	palmdelphin	Palmd	3.78105	5.88295e-07	-1.71543	0.0844207	-0.996123	0.412275	-0.952799	0.919661	-2.1404	0.000124957	-0.0440096	0.957177	-0.30547	0.999804
240119	beta galactoside alpha 2,6 sialyltransferase 2	St6gal2	3.39953	1.2478e-10	-2.29934	0.000285007	-0.497583	0.417351	-0.162069	0.985318	-1.12005	0.000141648	-0.304974	0.509391	0.0572867	0.999804
26950	visinin-like 1	Vsnl1	4.34061	9.81628e-16	-1.22173	0.000363216	0.280041	0.417524	-0.113103	0.982544	-0.724283	7.43e-06	-0.0611773	0.804413	-0.140804	0.999804
12889	complexin 1	Cplx1	2.99819	8.36066e-12	-1.82611	4.32462e-05	-0.334576	0.432086	-0.504394	0.747437	-0.592058	0.00373576	0.288217	0.429536	0.1188	0.999804
12424	cholecystokinin	Cck	5.32765	7.26643e-11	0.220871	0.744683	0.624784	0.432976	0.475429	0.961687	-0.474766	0.0343192	-0.175798	0.66407	-0.145267	0.999804
320492	RIKEN cDNA A830018L16 gene	A830018L16Rik	4.40391	2.39843e-11	-1.42923	0.0210701	0.490435	0.438572	0.534708	0.904722	-0.626609	0.00567939	0.125302	0.756781	0.0668875	0.999804
67445	C1q and tumor necrosis factor related protein 4	C1qtnf4	3.98812	1.42846e-11	-0.925518	0.0608014	0.420545	0.451609	-0.0716986	0.998865	-0.423638	0.0290444	-0.198223	0.566088	-0.0359038	0.999804
19337	RAB33A, member RAS oncogene family	Rab33a	3.78351	2.84359e-09	-1.52294	0.0304873	-0.6315	0.453419	0.0773031	0.998865	-1.28813	0.000146947	-0.606099	0.305152	-0.219541	0.999804
12721	coronin, actin binding protein 1A	Coro1a	3.69077	6.9311e-11	-3.52935	5.89328e-05	-0.488637	0.455627	-0.568508	0.881198	-1.21665	2.61e-05	-0.440048	0.346169	0.0900623	0.999804
76897	RALY RNA binding protein-like	Ralyl	3.62601	5.12307e-12	-0.771322	0.056456	0.350254	0.47186	-0.441875	0.902548	-0.383854	0.035472	0.332006	0.363864	-0.234421	0.999804
234290	cDNA sequence BC030500	BC030500	4.48887	1.61408e-06	-0.782061	0.468609	0.748512	0.484427	-0.796455	0.961687	-0.893647	0.0551319	0.227783	0.774438	0.105906	0.999804
66104	transcription elongation factor A (SII)-like 6	Tceal6	3.46502	2.78453e-09	-1.26381	0.0339268	-0.49002	0.489234	-0.109498	0.998865	-0.0575853	0.814998	0.121179	0.792261	0.0045211	0.999804
319352	PILR alpha associated neural protein	Pianp	3.79014	6.98077e-07	-1.33663	0.167114	0.702822	0.492211	0.864467	0.897203	-0.470203	0.218925	0.0105818	0.990826	-0.138991	0.999804
14432	growth associated protein 43	Gap43	4.52226	1.17436e-17	-0.720877	0.000990874	0.167043	0.501803	0.152503	0.961687	-0.615039	1.5e-05	-0.0740265	0.726754	-0.0811665	0.999804
20743	spectrin beta, non-erythrocytic 2	Sptbn2	4.19722	2.46678e-14	-2.09253	7.86233e-06	-0.247555	0.537097	-0.266068	0.946591	-1.35581	5.79e-07	-0.223306	0.513499	-0.0719919	0.999804
110075	bone morphogenetic protein 3	Bmp3	4.15607	5.11098e-06	-2.30326	0.0933512	-0.940282	0.53742	0.556605	0.975652	-2.06167	0.000779354	-0.612955	0.473475	-0.226633	0.999804
14560	growth differentiation factor 10	Gdf10	4.66206	1.34831e-08	-2.36244	0.0101978	0.552389	0.541629	0.133925	0.998865	-1.59672	0.000154622	-0.426097	0.464232	-0.0221451	0.999804
268859	RNA binding protein, fox-1 homolog (C. elegans) 1	Rbfox1	4.20498	2.52063e-13	1.59426	1.39226e-05	0.286689	0.548506	-0.268118	0.961687	0.165348	0.291993	0.31462	0.351885	0.0915507	0.999804
13446	double C2, alpha	Doc2a	3.93093	5.57212e-10	-1.5304	0.0202789	0.406432	0.552742	-0.0642302	0.998865	-1.13105	0.000152195	-0.00732833	0.989532	0.204967	0.999804
12661	cell adhesion molecule L1-like	Chl1	4.32004	6.80163e-17	-0.316061	0.120178	0.157259	0.556524	0.00435855	0.998865	-1.02437	1.38e-07	0.00590837	0.984815	0.0163143	0.999804
20491	src-like adaptor	Sla	6.88033	3.17814e-07	-1.87159	0.296656	-1.12891	0.558987	-0.430291	0.994208	-2.62752	1.56e-05	-0.623864	0.413405	-0.0800192	0.999804
17295	met proto-oncogene	Met	3.65276	4.3195e-10	0.330504	0.470508	-0.413871	0.575735	0.0101147	0.998865	-1.64967	6.83e-06	0.0445213	0.938593	0.0513938	0.999804
11516	adenylate cyclase activating polypeptide 1	Adcyap1	6.57805	0.00027141	1.22509	0.57424	1.32834	0.590136	-0.341538	0.998865	-0.394922	0.530843	-0.711505	0.563077	0.183403	0.999804
545554	ankyrin repeat domain 34A	Ankrd34a	3.40607	4.59768e-07	-2.44295	0.0101821	0.466035	0.591679	-1.15367	0.823461	-0.724983	0.0443861	-0.203631	0.756527	0.043394	0.999804
108068	glutamate receptor, metabotropic 2	Grm2	4.29265	1.47479e-09	-1.16503	0.108751	-0.492306	0.591679	-0.236566	0.989934	-1.5193	3.84e-05	-0.35293	0.488865	0.0939532	0.999804
219257	protocadherin 20	Pcdh20	5.53256	2.76726e-06	-1.06852	0.493805	-0.955801	0.636364	-0.784146	0.978614	-1.84409	0.00108124	-0.632204	0.46544	-0.0498104	0.999804
207495	BAI1-associated protein 2-like 2	Baiap2l2	4.48248	1.13396e-06	-0.563268	0.61	0.567476	0.645885	-0.206471	0.998865	0.436342	0.210496	-0.0535456	0.950643	-0.0460569	0.999804
67498	potassium channel, subfamily V, member 1	Kcnv1	4.43692	7.46063e-06	-2.13553	0.145111	-0.643581	0.69296	0.223288	0.998865	-1.38157	0.00928431	-0.469564	0.574142	-0.0751531	0.999804
72296	RUN and SH3 domain containing 1	Rusc1	3.85751	9.58852e-15	-0.239184	0.367953	-0.151797	0.699995	-0.417227	0.79073	-0.540547	0.000582713	-0.245604	0.39185	-0.143548	0.999804
215890	clavesin 2	Clvs2	4.13716	1.15965e-07	-1.75477	0.0631168	0.381662	0.701209	-0.462654	0.977377	-0.643362	0.0619694	-0.588335	0.401494	-0.0897006	0.999804
231503	transmembrane protein 150C	Tmem150c	4.1816	2.01634e-09	-0.705243	0.298935	-0.352964	0.701841	0.500961	0.956924	-1.06781	0.000746276	-0.362024	0.481078	0.00299304	0.999804
100040870	predicted gene 3005	Gm3005	5.04001	0.00600431	2.69176	0.181763	1.10744	0.703302	-0.225055	0.998865	-1.25387	0.215509	1.70822	0.296573	0.884042	0.999804
228543	ras homolog family member V	Rhov	5.68887	1.23904e-07	0.553645	0.612291	0.445758	0.722539	0.759912	0.961974	-1.46049	0.0012036	-0.359598	0.577585	-0.0779273	0.999804
77629	SPHK1 interactor, AKAP domain containing	Sphkap	3.85513	5.76156e-08	-1.78206	0.0420123	-0.350803	0.739436	0.485676	0.961687	-1.81649	0.000155451	-0.402876	0.55839	0.0867951	0.999804
232370	calsyntenin 3	Clstn3	3.74866	1.08744e-13	-1.20969	0.00119579	0.133461	0.749239	0.147761	0.978684	-0.778374	7.59e-05	-0.116019	0.70236	-0.0353948	0.999804
20605	somatostatin receptor 1	Sstr1	4.92054	3.3561e-06	-2.21636	0.145461	-0.502448	0.758132	-0.43622	0.99119	-2.23	0.000475367	-0.658083	0.447426	0.100954	0.999804
14077	fatty acid binding protein 3, muscle and heart	Fabp3	5.02778	4.57684e-14	-0.203626	0.625984	0.166813	0.758919	-0.022402	0.998865	-0.46491	0.00299228	0.045622	0.887138	-0.0494926	0.999804
72978	cornichon family AMPA receptor auxiliary protein 3	Cnih3	3.46846	7.5402e-11	-1.43781	0.0062047	0.176111	0.759009	-0.349947	0.961687	-0.865893	0.000409433	-0.0860472	0.83864	0.0847218	0.999804
241528	leucine rich repeat containing 55	Lrrc55	4.02879	1.95801e-09	0.371809	0.515255	-0.264596	0.761974	-0.0638725	0.998865	-1.2787	0.000179025	-0.328362	0.517372	-0.105246	0.999804
12570	cyclin-dependent kinase 5, regulatory subunit 2 (p39)	Cdk5r2	4.47483	9.04503e-15	-1.73405	0.000148199	-0.132328	0.772813	-0.198924	0.968145	-1.04722	3.86e-07	-0.208366	0.429536	-0.00962341	0.999804
68203	DIRAS family, GTP-binding RAS-like 2	Diras2	3.87997	5.03061e-10	3.75619	2.52604e-09	-0.213797	0.782515	-0.15159	0.99369	-0.383522	0.124285	-0.345666	0.477588	-0.0535202	0.999804
238266	synaptotagmin XVI	Syt16	4.59212	1.56021e-14	-1.46719	0.000953333	0.129346	0.784568	0.218505	0.961974	-0.801079	2.21e-05	0.0677892	0.81907	-0.0690379	0.999804
237847	reticulon 4 receptor-like 1	Rtn4rl1	4.53285	1.49751e-10	-1.34145	0.0498715	-0.214947	0.794004	0.597725	0.910581	-1.5029	7.14e-06	-0.308963	0.468073	0.026522	0.999804
16323	inhibin beta-A	Inhba	4.7682	3.06312e-09	1.67703	0.00832532	-0.276162	0.794762	0.313074	0.982544	-1.07579	0.000996794	-0.163815	0.762636	0.166652	0.999804
75552	progestin and adipoQ receptor family member IX	Paqr9	3.71449	3.94556e-12	-1.55114	0.00171434	-0.141231	0.796969	0.0384721	0.998865	-1.30327	1.86e-06	-0.0809445	0.826942	0.0662014	0.999804
77630	PR domain containing 8	Prdm8	5.83433	4.08974e-06	-1.90886	0.314299	0.494876	0.797026	0.457647	0.99162	-2.0605	0.000895512	-0.930083	0.384391	-0.0117164	0.999804
12933	collapsin response mediator protein 1	Crmp1	3.58824	9.20558e-15	-2.09225	4.49447e-08	-0.0717679	0.797432	-0.136592	0.970045	-0.990733	3.61e-06	0.155509	0.581614	-0.0152426	0.999804
100042100	predicted gene 3667	Gm3667	4.1309	4.75493e-08	3.52935	1.70129e-06	0.240579	0.804887	-0.999278	0.895498	-0.179687	0.553685	-0.225676	0.690942	-0.294614	0.999804
69352	N-terminal EF-hand calcium binding protein 1	Necab1	5.94872	4.55761e-15	-0.740478	0.0970388	0.136496	0.810927	0.160736	0.986018	-0.792953	9.96e-06	0.0054245	0.987592	-0.108367	0.999804
12862	cytochrome c oxidase subunit 6A2	Cox6a2	4.42783	2.68403e-09	0.197125	0.777192	0.170812	0.835754	0.572641	0.951223	0.0257598	0.924826	0.0138397	0.982163	0.0551542	0.999804
625638	family with sequence similarity 43, member B	Fam43b	3.30026	5.79662e-07	-2.99706	0.00531167	0.177351	0.852053	-0.140786	0.998865	-1.46044	0.000898399	-0.48545	0.466733	0.130608	0.999804
17260	myocyte enhancer factor 2C	Mef2c	4.6909	2.55715e-13	1.49251	0.000102771	0.0897876	0.867479	-0.177412	0.981405	-1.01351	0.000127549	-0.0217257	0.967152	0.191754	0.999804
65115	brain expressed, associated with Nedd4, 1	Bean1	3.61602	7.22298e-10	-0.92939	0.0914622	-0.116808	0.868044	-0.675461	0.870666	-0.526836	0.0250109	0.277907	0.484238	-0.0924661	0.999804
16538	K+ voltage-gated channel, subfamily S, 1	Kcns1	4.17954	3.18175e-09	-1.09513	0.124701	-0.120874	0.892136	0.0212239	0.998865	-1.82935	1.15e-05	-0.348797	0.481078	-0.108346	0.999804
239408	transmembrane protein 74	Tmem74	4.65955	9.66104e-08	1.2543	0.102315	0.103367	0.93477	0.0921958	0.998865	-1.4332	0.000767658	-0.40143	0.532345	0.0126912	0.999804
59058	basic helix-loop-helix family, member e22	Bhlhe22	6.82892	1.78677e-06	-0.100261	0.9567	0.152049	0.94918	-0.143328	0.998865	-2.13548	0.000614866	-1.04045	0.354419	-0.136759	0.999804
11857	Rho, GDP dissociation inhibitor (GDI) beta	Arhgdib	5.28384	7.8448e-10	-1.31395	0.121797	0.0558137	0.954954	-0.937421	0.9062	-0.518897	0.0404896	-0.484581	0.360997	-0.0698218	0.999804
20503	solute carrier family 16 (monocarboxylic acid transporters), member 7	Slc16a7	3.61592	3.17297e-10	-0.865835	0.0888192	-0.0332295	0.96386	0.261669	0.970555	-0.59723	0.0190396	0.168476	0.712325	0.166395	0.999804
72022	solute carrier family 35, member F2	Slc35f2	3.90726	5.46589e-12	-1.38382	0.00518344	-0.0254922	0.965537	0.36208	0.94423	-1.27069	2.23e-06	-0.181867	0.558243	-0.0963375	0.999804
223726	metallophosphoesterase domain containing 1	Mpped1	5.29019	1.01278e-15	-1.53187	0.000471274	-0.0185066	0.970193	-0.216893	0.961974	-0.993917	1.89e-06	0.192827	0.487997	0.0893636	0.999804
76980	ubiquitin-conjugating enzyme E2Q family-like 1	Ube2ql1	3.82462	8.89036e-14	0.052412	0.864632	-0.0157871	0.972346	-0.160132	0.977942	-0.525463	0.00345794	0.0833315	0.8057	-0.0661719	0.999804
69642	muscular LMNA-interacting protein	Mlip	5.72099	2.05705e-08	0.678593	0.476455	0.0361401	0.978023	0.73709	0.961687	-0.0633434	0.838104	0.289343	0.574142	-0.181565	0.999804
11922	neurogenic differentiation 6	Neurod6	9.13056	6.94287e-05	-0.991139	0.775594	0.066396	0.987657	-0.40968	0.998865	-2.34384	0.000786842	-1.02814	0.39185	-0.0387915	0.999804
21375	T-box brain gene 1	Tbr1	4.81353	4.73523e-08	-1.31767	0.202675	-0.0185842	0.989446	-0.132297	0.998865	-1.83041	8.49e-05	-0.626997	0.383228	-0.0714291	0.999804
319984	junctophilin 4	Jph4	3.7496	1.68924e-16	-1.59486	4.40048e-07	-0.00350314	0.990902	-0.0917501	0.981405	-0.582952	3.98e-05	-0.0184	0.946281	-0.0337922	0.999804
18012	neurogenic differentiation 1	Neurod1	5.25503	8.75307e-06	-0.0808949	0.959087	0.0225894	0.991451	0.180188	0.998865	-1.95534	0.00163031	-0.829501	0.408345	-0.168288	0.999804
269295	reticulon 4 receptor-like 2	Rtn4rl2	6.36045	2.7357e-08	-1.14645	0.375265	-0.0157051	0.992306	0.0630715	0.998865	-1.60386	0.000120393	-0.569071	0.383665	0.045757	0.999804
64293	serine/threonine kinase 32B	Stk32b	4.10075	2.23637e-11	-3.21161	0.000115205	-0.00426709	0.995485	-0.40759	0.961256	-0.866664	0.000287683	0.23828	0.506588	0.126137	0.999804

## Sheet: highly_variable_band3
entrezid	genename	symbol	resting_immature_v_mature_logfc	resting_immature_v_mature_P.adj	mature_ifn_sfv_v_resting_logfc	mature_ifn_sfv_v_resting_P.adj	mature_sfv_v_resting_logfc	mature_sfv_v_resting_P.adj	mature_ifn_v_resting_logfc	mature_ifn_v_resting_P.adj	immature_ifn_sfv_v_resting_logfc	immature_ifn_sfv_v_resting_P.adj	immature_sfv_v_resting_logfc	immature_sfv_v_resting_P.adj	immature_ifn_v_resting_logfc	immature_ifn_v_resting_P.adj
69550	bone marrow stromal cell antigen 2	Bst2	-2.76046	1.55571e-14	1.31101	1.93426e-10	-2.67627	9.1256e-11	-4.05481	2.33e-14	2.19309	1.43e-11	-3.97296	5.58995e-09	-5.25342	5.6325e-10
19039	lectin, galactoside-binding, soluble, 3 binding protein	Lgals3bp	-3.73572	2.28343e-14	0.877107	2.31513e-06	-3.51249	6.46502e-10	-3.46831	2.57e-12	1.54314	1.01e-06	-2.80606	6.50701e-05	-3.26994	4.53315e-06
23962	2'-5' oligoadenylate synthetase-like 2	Oasl2	-2.77561	3.4393e-11	3.49139	4.01511e-15	0.379926	0.0805507	-4.52319	7.94e-11	4.4051	8.82e-14	-3.72667	3.10814e-05	-4.77364	4.53315e-06
20846	signal transducer and activator of transcription 1	Stat1	-2.73582	1.38718e-12	2.63545	4.59512e-14	-1.09043	2.36305e-05	-2.30068	7.49e-10	3.79014	4.82e-14	-1.56536	0.00114491	-1.81451	6.63265e-05
16913	proteasome (prosome, macropain) subunit, beta type 8 (large multifunctional peptidase 7)	Psmb8	-2.34003	1.03497e-08	3.13166	9.79144e-14	-1.01795	0.00602556	-2.0288	1.81e-06	2.86553	3.26e-09	-2.60127	0.00667195	-4.46974	8.94895e-05
672511	ring finger protein 213	Rnf213	-2.47635	1.23644e-09	3.99421	6.1944e-15	1.64749	4.14155e-07	-1.87438	2.38e-06	4.59736	1.62e-13	-1.34345	0.0536465	-2.14153	0.000438497
15944	immunity-related GTPase family M member 1	Irgm1	-3.18497	1.18342e-12	3.46873	1.38229e-16	0.872673	3.77431e-05	-2.25656	1.6e-09	4.1599	1.01e-13	-1.0788	0.17442	-2.14173	0.00050972
78781	zinc finger CCCH type, antiviral 1	Zc3hav1	-2.51162	8.67714e-12	3.8132	5.22519e-18	0.511836	0.00643005	-2.18589	1.6e-09	4.5692	3.26e-15	-1.29048	0.0223841	-1.63598	0.00110282
110558	histocompatibility 2, Q region locus 9	H2-Q9	-2.12898	8.34184e-08	4.11449	8.61724e-16	2.51297	2.89596e-10	-3.67889	5.9e-08	4.01509	1.23e-11	-2.01354	0.0312469	-2.79914	0.00137432
70110	interferon-induced protein 35	Ifi35	-3.06563	1.96844e-12	3.24292	5.25907e-17	-0.355238	0.0932405	-1.62115	5.37e-08	3.82998	3.92e-13	-2.17346	0.00182653	-1.88943	0.00138468
76933	interferon, alpha-inducible protein 27 like 2A	Ifi27l2a	-2.5677	2.18334e-07	0.458093	0.0703677	-4.57731	7.69287e-06	-5.34564	2.71e-07	0.731916	0.104356	-4.59163	0.00376835	-4.48647	0.0016955
20128	tripartite motif-containing 30A	Trim30a	-5.32135	4.15723e-14	3.61942	1.07846e-17	-0.850701	0.000227231	-2.8554	3.09e-11	5.6661	1.27e-13	-2.77106	0.0136917	-3.06499	0.00202159
246730	2'-5' oligoadenylate synthetase 1A	Oas1a	-3.25148	7.58057e-09	4.44343	5.68453e-16	0.267765	0.40248	-6.5962	4.67e-08	5.38589	1.12e-11	-3.94928	0.00881905	-4.28175	0.00240849
67775	receptor transporter protein 4	Rtp4	-4.55806	3.42422e-13	2.34327	1.43562e-13	-0.699864	0.00314347	-3.87514	3.09e-11	4.99097	7.16e-13	-1.68363	0.139189	-2.67626	0.00341733
54123	interferon regulatory factor 7	Irf7	-4.29324	4.52778e-11	2.80215	1.51812e-11	-1.05402	0.00269832	-6.62088	4.44e-09	4.38738	3.43e-10	-3.88293	0.0155454	-5.01175	0.00395631
15015	histocompatibility 2, Q region locus 4	H2-Q4	-2.78775	3.1262e-09	3.44292	3.75313e-13	1.5351	3.83196e-06	-2.71568	1.81e-07	3.57138	4.13e-10	-1.76224	0.0855761	-2.43887	0.00529435
80285	poly (ADP-ribose) polymerase family, member 9	Parp9	-3.41096	2.70969e-13	3.70201	1.07846e-17	0.956935	4.72991e-06	-1.89389	4.4e-09	4.6318	1.29e-14	-0.796345	0.26812	-1.48107	0.00873307
16859	lectin, galactose binding, soluble 9	Lgals9	-1.83129	3.57911e-05	3.55737	4.23227e-12	0.150398	0.739088	-3.98385	9.49e-06	3.03799	1.03e-07	-2.53544	0.0855761	-3.37944	0.00873307
24110	ubiquitin specific peptidase 18	Usp18	-4.23897	1.26721e-12	4.30993	8.97349e-18	1.82888	1.29575e-09	-3.21933	2.72e-10	6.28084	1.29e-14	-1.29939	0.247208	-2.29875	0.0115328
209200	deltex 3-like, E3 ubiquitin ligase	Dtx3l	-3.03847	1.04138e-11	3.85889	4.60496e-17	1.36776	1.54509e-07	-1.73401	1.44e-07	4.58676	7.27e-14	-0.974888	0.247208	-1.49552	0.0217243
58203	Z-DNA binding protein 1	Zbp1	-1.33812	0.00447955	7.71206	9.39217e-17	1.85797	0.00017508	-3.62812	0.000133442	5.59956	1.41e-11	-1.66359	0.267815	-2.90974	0.0230198
327959	XIAP associated factor 1	Xaf1	-4.35333	2.72709e-10	3.0728	3.71713e-13	-0.548937	0.098208	-2.86502	1.34e-07	5.13716	1.51e-10	-2.65018	0.184156	-3.51624	0.0304979
236573	guanylate-binding protein 9	Gbp9	-3.38281	1.18791e-10	5.08759	2.29658e-18	1.06626	5.52069e-05	-2.96339	1.65e-08	5.85507	7.21e-14	-0.949149	0.342934	-2.05114	0.0323186
15040	histocompatibility 2, T region locus 23	H2-T23	-3.98102	7.4244e-10	2.76821	5.3268e-12	-0.230489	0.483896	-4.1786	3.15e-08	3.36067	1.3e-07	-1.76627	0.267815	-3.21757	0.0327071
434341	NLR family, CARD domain containing 5	Nlrc5	-2.26722	2.58411e-07	4.40876	3.98541e-15	2.44695	4.66956e-09	-1.26784	0.00494757	4.32583	3.21e-11	-1.40069	0.255874	-1.97206	0.0750874
100038882	ISG15 ubiquitin-like modifier	Isg15	-3.76789	3.92237e-09	4.0944	3.76454e-14	1.49034	1.69029e-05	-4.17019	1.22e-07	5.56325	4.4e-11	-1.90446	0.260406	-3.09061	0.0759797
99899	interferon-induced protein 44	Ifi44	-4.41157	2.43678e-09	4.84367	7.94714e-16	-0.570809	0.129675	-4.51051	1.19e-07	6.53723	2.76e-11	-1.45543	0.383665	-3.70186	0.0927214
110454	lymphocyte antigen 6 complex, locus A	Ly6a	-5.44478	9.60722e-12	1.42642	7.53617e-09	-4.03118	1.07195e-07	-4.59214	7.49e-10	1.41558	0.0101733	-2.40706	0.187183	-2.33728	0.256872
547253	poly (ADP-ribose) polymerase family, member 14	Parp14	-4.33752	9.73485e-13	5.19059	1.6636e-19	1.43726	5.01442e-08	-2.20143	6.31e-09	7.22991	2.25e-15	-0.858826	0.376185	-1.47031	0.283547
209086	sterile alpha motif domain containing 9-like	Samd9l	-3.6036	7.19957e-09	4.04017	1.81824e-13	2.65718	4.81297e-09	-0.756333	0.3472	5.16713	1.29e-10	-1.2834	0.356973	-2.25866	0.308187
55932	guanylate binding protein 3	Gbp3	-3.83896	2.87051e-10	4.0863	1.02188e-14	1.35128	1.84772e-05	-3.02111	7.24e-08	5.3804	8.65e-12	-1.51761	0.267815	-1.86279	0.312536
94094	tripartite motif-containing 34A	Trim34a	-4.37044	6.77941e-14	2.51492	5.69567e-15	0.918373	5.06105e-06	-1.5662	2.41e-08	4.5259	3.92e-13	-0.528154	0.460216	-1.18068	0.320129
54396	immunity-related GTPase family M member 2	Irgm2	-5.53485	2.14409e-14	3.59137	2.68631e-18	1.32094	6.68352e-09	-2.2221	1.62e-10	6.37576	1.92e-14	-0.307712	0.712287	-1.41241	0.381481
110557	histocompatibility 2, Q region locus 6	H2-Q6	-2.77854	2.43789e-05	5.33362	4.59512e-14	3.86575	2.51916e-10	-3.57363	0.000268021	5.24806	7.16e-09	-1.71004	0.374686	-2.90033	0.509316
60440	interferon inducible GTPase 1	Iigp1	-3.57394	1.52402e-11	5.65849	1.6636e-19	0.633123	0.00520467	-3.8572	7.31e-10	6.37371	7.78e-15	-1.52399	0.198602	-1.18053	0.611325
100702	guanylate binding protein 6	Gbp6	-4.67586	1.87152e-09	4.05723	5.17514e-13	1.82728	3.95147e-06	-2.96382	1.28e-06	6.14879	1.51e-10	-1.2535	0.418373	-2.51921	0.718407
30935	torsin family 3, member A	Tor3a	-3.56244	6.28758e-15	3.78385	9.89088e-19	-0.213178	0.169083	-0.891438	1.05e-05	4.08905	7.78e-15	-0.761958	0.226778	-0.621217	0.789737
240327	predicted gene 4951	Gm4951	-6.04105	2.68052e-11	3.64016	9.49661e-16	-0.883819	0.0042582	-4.88698	7.85e-10	6.73891	4.4e-11	-1.96785	0.320778	-2.24911	0.827986
74732	syntaxin 11	Stx11	-0.544192	0.331723	7.09874	9.52204e-14	5.92602	2.23955e-11	-1.54031	0.539098	5.46947	1.98e-10	1.53661	0.236115	0.0356586	0.999804
18037	nuclear factor of kappa light polypeptide gene enhancer in B cells inhibitor, epsilon	Nfkbie	-1.04581	0.141763	5.84038	7.61217e-11	6.58044	4.96289e-11	-0.438884	0.968898	4.79873	2.35e-07	1.11742	0.44357	-0.223132	0.999804
60533	CD274 antigen	Cd274	-2.93558	5.05751e-06	7.02536	6.49516e-17	3.85362	7.08336e-11	-0.876276	0.539673	7.05097	1.68e-11	0.953605	0.441119	-0.175347	0.999804
23961	2'-5' oligoadenylate synthetase 1B	Oas1b	-3.4965	1.26658e-05	5.79294	2.33456e-14	4.31023	7.25038e-11	-3.1075	0.00115884	7.49205	4.13e-10	-0.916998	0.617601	-2.02368	0.999804
24088	toll-like receptor 2	Tlr2	-3.1584	4.70469e-05	7.46593	8.16442e-16	4.57844	7.33508e-11	-1.0407	0.592451	7.59767	2.33e-10	1.04444	0.49873	0.0535079	0.999804
215418	cysteine-serine-rich nuclear protein 1	Csrnp1	-1.12053	0.0653152	6.25651	1.37627e-12	5.55189	8.39276e-11	-0.45038	0.961687	4.88569	1.96e-08	1.03534	0.422266	0.354218	0.999804
229900	guanylate binding protein 7	Gbp7	-3.26195	2.24384e-08	4.93319	3.98541e-15	3.33235	9.1256e-11	-1.52251	0.00141474	5.51864	2.35e-11	0.130163	0.915897	-1.24572	0.999804
229003	helicase with zinc finger 2, transcriptional coactivator	Helz2	-2.81858	1.51334e-06	5.12638	8.02949e-15	3.57113	1.0975e-10	-2.17969	0.000635254	5.4075	2.01e-10	0.742293	0.488865	-0.356414	0.999804
15894	intercellular adhesion molecule 1	Icam1	-2.86555	0.00215297	5.362	8.45978e-11	5.78387	1.23719e-10	-0.0314824	0.998865	5.41506	2.61e-06	1.15084	0.550061	0.181459	0.999804
14469	guanylate binding protein 2	Gbp2	-3.87865	7.25941e-06	6.90581	3.00163e-15	4.44232	1.38073e-10	-0.752794	0.752451	7.73496	8.73e-10	0.837409	0.604749	-0.801744	0.999804
67138	hect domain and RLD 6	Herc6	-3.96351	3.5226e-09	4.74265	4.01511e-15	3.12847	1.49128e-10	-1.46207	0.00124844	6.14556	1.76e-11	0.129551	0.924777	-0.597873	0.999804
71586	interferon induced with helicase C domain 1	Ifih1	-3.25933	1.72103e-05	5.74298	2.98282e-13	4.67482	1.49128e-10	-2.37245	0.00696264	6.58757	1.8e-09	-0.6895	0.685369	-2.2491	0.999804
15967	interferon alpha 4	Ifna4	-0.01319	0.994817	11.601	1.05682e-12	9.26952	2.35147e-10	-0.0646948	0.998865	9.50564	1.56e-10	1.36094	0.501671	-0.238696	0.999804
114643	2'-5' oligoadenylate synthetase 1C	Oas1c	-2.24396	0.00333029	4.03097	2.9379e-09	5.11402	2.55395e-10	-0.477323	0.961687	4.44162	2.34e-06	0.0457305	0.983805	-1.26051	0.999804
15024	histocompatibility 2, T region locus 10	H2-T10	-1.94898	0.0109376	5.24504	1.11017e-10	5.12946	1.02809e-09	-2.48162	0.1707	5.72058	5.62e-08	0.102865	0.96416	-0.795801	0.999804
545645	predicted gene 13283	Gm13283	-1.74679	0.116694	6.59542	7.68642e-09	7.87464	1.12014e-09	-0.297989	0.994208	6.57376	8.8e-07	1.81489	0.43081	-0.442887	0.999804
16149	CD74 antigen (invariant polypeptide of major histocompatibility complex, class II antigen-associated)	Cd74	-2.53962	0.0283884	6.81505	1.8996e-09	7.5238	1.12208e-09	-1.66599	0.843446	7.32728	4.45e-07	2.75881	0.301811	0.357328	0.999804
545648	predicted gene 13272	Gm13272	0.00537367	0.997302	7.06211	1.85452e-08	8.72322	1.46465e-09	0.952136	0.961687	5.41102	3.52e-06	1.31177	0.528288	-0.247545	0.999804
21929	tumor necrosis factor, alpha-induced protein 3	Tnfaip3	-1.67411	0.0319404	6.38829	1.10802e-11	5.29883	1.68518e-09	-0.289249	0.982544	5.74306	9.02e-08	0.856991	0.593245	-0.370368	0.999804
319146	interferon zeta	Ifnz	-1.94675	0.128083	6.65661	3.66296e-08	8.44168	1.71607e-09	-0.710493	0.975652	6.76978	3.82e-06	1.54067	0.550441	-0.908671	0.999804
15958	interferon-induced protein with tetratricopeptide repeats 2	Ifit2	-2.50194	1.73363e-11	5.32681	1.1612e-19	1.703	1.91702e-09	0.045175	0.994208	5.1762	8.26e-16	0.0557161	0.924777	-0.353363	0.999804
229898	guanylate binding protein 5	Gbp5	-3.13153	0.0246699	8.13626	3.92942e-11	7.033	1.93201e-09	-1.08025	0.926062	8.72811	1.42e-06	1.27092	0.669817	-0.788934	0.999804
11910	activating transcription factor 3	Atf3	-0.56735	0.503005	6.51775	4.53023e-10	6.387	2.33516e-09	-0.134986	0.998865	4.72539	1.15e-06	0.599749	0.713056	-0.504095	0.999804
545654	predicted gene 13285	Gm13285	-3.0199	0.0678631	7.68857	1.62174e-08	9.03834	2.44389e-09	-0.593314	0.982544	8.87651	5.67e-06	1.96518	0.560234	-0.451997	0.999804
245240	RIKEN cDNA 9930111J21 gene 2	9930111J21Rik2	-4.00233	0.000167003	8.85826	3.11761e-14	5.23931	2.77e-09	-3.86311	0.0138795	9.09283	2.39e-09	1.09088	0.620894	1.59109	0.999804
15945	chemokine (C-X-C motif) ligand 10	Cxcl10	-3.82582	0.000106517	7.21124	1.47175e-14	4.20214	2.77794e-09	-0.627939	0.897203	8.06488	1.04e-08	0.917053	0.646467	-0.53597	0.999804
545646	predicted gene 13290	Gm13290	-1.33263	0.336406	7.60568	3.99567e-08	9.35828	2.80782e-09	-0.158181	0.998865	7.37435	1.51e-06	1.30811	0.622364	-0.402066	0.999804
112419	interferon induced protein with tetratricopeptide repeats 1B like 2	Ifit1bl2	-4.7176	4.49723e-07	4.21093	8.42871e-13	3.20667	2.85411e-09	-2.39803	0.0012085	6.97941	5e-09	0.633189	0.723062	-1.65911	0.999804
74442	sphingomyelin synthase 2	Sgms2	-2.55042	0.00306913	4.59348	1.00032e-09	4.70957	3.46381e-09	0.0279821	0.998865	3.9827	5.03e-05	0.807049	0.658577	-0.869237	0.999804
17858	MX dynamin-like GTPase 2	Mx2	-3.14269	0.000926096	6.3149	3.54481e-12	4.7922	3.47661e-09	-2.95586	0.0651487	7.67749	2.06e-08	-0.518637	0.839829	-2.11972	0.999804
20296	chemokine (C-C motif) ligand 2	Ccl2	-3.30373	0.00707974	7.98277	5.3268e-12	5.9741	3.56264e-09	-0.410504	0.981405	7.43439	1.48e-06	0.403048	0.910107	-2.251	0.999804
630499	histocompatibility 2, K region locus 2	H2-K2	0.188323	0.905588	9.81653	3.2262e-09	10.123	3.98253e-09	0.342344	0.998501	7.23993	7.04e-07	1.76645	0.465686	0.0407338	0.999804
629303	HEAT repeat containing 9	Heatr9	-0.767449	0.601039	9.07734	7.99364e-09	9.76259	4.95551e-09	-1.35531	0.951863	7.79984	5.3e-07	1.20793	0.648854	-0.77505	0.999804
668208	predicted gene 13288	Gm13288	-1.49359	0.253586	6.87059	5.28882e-08	8.31808	5.18381e-09	-0.225782	0.998865	7.08536	1.85e-06	1.29806	0.611615	-0.603388	0.999804
246779	interleukin 27	Il27	-0.01319	0.993579	9.21815	5.42276e-13	6.31446	6.36874e-09	0.978437	0.902202	6.06462	6.5e-09	0.234469	0.903144	-0.238696	0.999804
14526	glucagon	Gcg	2.52219	0.0226684	8.05094	1.18596e-08	8.86934	6.51632e-09	-0.0646948	0.998865	4.37712	6.8e-06	-0.0980428	0.967949	-1.73244	0.999804
15117	hyaluronan synthase 2	Has2	0.520129	0.507637	7.32424	4.56501e-11	5.90233	8.96061e-09	0.443921	0.978216	5.19332	1.53e-08	1.40173	0.336496	0.496674	0.999804
11796	baculoviral IAP repeat-containing 3	Birc3	-2.0787	0.0319382	6.02447	7.32941e-10	5.64603	9.06336e-09	0.369717	0.981405	6.70663	1.58e-07	0.318385	0.906176	-0.0829055	0.999804
14089	fibroblast activation protein	Fap	-1.85145	0.223155	7.76703	3.30213e-08	8.6626	1.1049e-08	-1.91214	0.902548	8.06171	3.12e-06	2.08915	0.487762	0.776865	0.999804
231655	2'-5' oligoadenylate synthetase-like 1	Oasl1	-2.76636	0.0458566	8.53758	7.75079e-11	6.77667	1.14734e-08	-3.34464	0.582345	9.4434	3.23e-07	0.289726	0.943658	-0.527641	0.999804
16600	Kruppel-like factor 4 (gut)	Klf4	-2.00069	0.0171872	5.0261	1.7607e-09	4.89732	1.20567e-08	-0.677002	0.94423	5.47636	6.61e-07	1.25691	0.473475	0.119001	0.999804
21926	tumor necrosis factor	Tnf	0.450095	0.738032	7.01935	2.18318e-07	8.70159	1.45564e-08	-0.60369	0.982544	4.28054	0.000237741	1.68643	0.457454	0.0500851	0.999804
102640171	predicted gene, 38525	Gm38525	-3.50081	0.000412022	5.20816	1.63376e-09	5.09927	1.52823e-08	-0.521758	0.962318	5.72723	1.29e-06	1.60312	0.447426	-0.241206	0.999804
545647	predicted gene 13289	Gm13289	-0.100285	0.95706	8.54272	7.50903e-08	9.83248	1.56255e-08	0.717038	0.981405	6.37089	1.36e-05	1.3906	0.616037	-0.319147	0.999804
20304	chemokine (C-C motif) ligand 5	Ccl5	-1.67227	0.174485	10.4885	7.77127e-12	7.10911	1.77575e-08	-0.314986	0.994293	9.36329	2.11e-08	1.12244	0.65477	-0.548474	0.999804
14025	B cell CLL/lymphoma 11A (zinc finger protein)	Bcl11a	2.68133	0.0249275	5.74725	2.44958e-05	9.55663	1.89166e-08	0.0279626	0.998865	3.57632	0.000343707	1.46048	0.43694	-0.0344428	0.999804
15977	interferon beta 1, fibroblast	Ifnb1	-1.56798	0.317281	11.1057	4.27182e-10	9.09915	2.28255e-08	-1.6217	0.938961	9.86422	1.58e-07	2.10241	0.48414	-0.239681	0.999804
17329	chemokine (C-X-C motif) ligand 9	Cxcl9	-0.443478	0.692655	10.9579	4.44613e-12	7.29907	2.36475e-08	-0.0678897	0.998865	7.55449	1.3e-08	1.08425	0.59677	-0.238696	0.999804
18548	proprotein convertase subtilisin/kexin type 1	Pcsk1	3.59984	5.73733e-08	6.82051	1.50687e-12	4.46236	2.57578e-08	-0.890604	0.877885	2.78449	2.01e-10	0.674197	0.267815	0.0608829	0.999804
234311	DEAD (Asp-Glu-Ala-Asp) box polypeptide 60	Ddx60	-3.94183	0.00023365	4.87553	1.21695e-09	4.44923	3.15691e-08	-3.53119	0.0184563	7.06336	3.51e-07	-0.510162	0.859042	-2.61188	0.999804
54199	chemokine (C-C motif) receptor-like 2	Ccrl2	-0.0143335	0.994817	9.7198	1.61369e-10	7.57375	4.33043e-08	-0.446233	0.991153	6.89037	1.89e-07	1.6964	0.443305	-0.619091	0.999804
74741	C2 calcium-dependent domain containing 5	C2cd5	-0.104337	0.944705	4.43391	0.00026178	8.0865	9.81865e-08	-0.0606845	0.998865	5.42307	3.59e-05	2.2033	0.383665	0.264677	0.999804
667214	RIKEN cDNA 9930111J21 gene 1	9930111J21Rik1	-2.23465	0.0343239	8.60546	3.22004e-11	5.87016	1.03975e-07	-2.35489	0.582345	6.9237	1.83e-07	1.13951	0.60587	-0.024231	0.999804
16409	integrin alpha M	Itgam	0.244298	0.885394	5.50694	7.53443e-05	8.86472	1.26714e-07	0.0338345	0.998865	5.67384	5.12e-05	2.31533	0.398632	0.498915	0.999804
628422	vomeronasal 2, receptor 58	Vmn2r58	0.0153803	0.995113	5.52379	0.000108186	9.02528	1.36408e-07	-0.0646948	0.998865	6.26569	2.9e-05	1.93621	0.498257	-0.267266	0.999804
228796	BPI fold containing family B, member 6	Bpifb6	-0.01319	0.995113	6.23187	9.30549e-06	8.56228	1.39941e-07	0.442559	0.993909	6.36827	1.14e-05	2.15369	0.43319	0.269077	0.999804
234836	interleukin 17C	Il17c	1.81621	0.26227	5.84225	0.000169899	9.86963	1.42788e-07	0.704299	0.989811	4.39003	0.000893604	0.787315	0.791993	-1.144	0.999804
70928	tripartite motif-containing 69	Trim69	-2.01339	0.143734	6.5144	4.99379e-07	7.40125	1.43756e-07	-1.00154	0.961974	7.59447	1.31e-06	1.78548	0.518754	0.287346	0.999804
319191	histone cluster 1, H2ai	Hist1h2ai	1.14386	0.47758	6.4234	2.03751e-05	9.17529	1.72402e-07	3.51416	0.383562	4.99716	0.000319095	0.662611	0.837047	-1.39806	0.999804
56066	chemokine (C-X-C motif) ligand 11	Cxcl11	-0.7703	0.687043	10.2456	5.93888e-08	9.82552	1.7302e-07	-0.037438	0.998865	8.6516	3.02e-06	2.6074	0.429536	0.0968224	0.999804
214854	neuralized E3 ubiquitin protein ligase 3	Neurl3	1.61326	0.187776	7.34425	3.18144e-07	7.9667	1.77894e-07	-0.455035	0.993497	4.42317	1.85e-05	0.354201	0.881089	-0.0851372	0.999804
74519	cytochrome P450, family 2, subfamily j, polypeptide 9	Cyp2j9	-2.42099	0.117977	2.97554	0.00298113	6.764	1.78388e-07	0.0549286	0.998865	5.52811	0.000791157	1.98753	0.525437	-0.171493	0.999804
78753	lipase, family member M	Lipm	1.52514	0.360534	5.93172	0.000145238	9.738	1.84442e-07	-0.0646948	0.998865	4.69674	0.000673333	0.547233	0.873312	-1.77703	0.999804
258308	olfactory receptor 510	Olfr510	-0.01319	0.996046	5.84596	0.00020917	9.81311	2.09887e-07	-0.0646948	0.998865	6.06267	0.00017763	2.65889	0.415083	-0.238696	0.999804
67074	MON2 homolog, regulator of endosome to Golgi trafficking	Mon2	-0.100279	0.952295	4.54049	0.000478499	8.26378	2.30116e-07	-0.0120448	0.998991	5.19295	0.000147899	2.18863	0.408345	-0.140483	0.999804
258273	olfactory receptor 1394	Olfr1394	-0.01319	0.995769	5.89696	0.000101397	9.24621	2.50608e-07	-0.0646948	0.998865	5.8143	0.000165801	2.00509	0.511297	0.288485	0.999804
12557	cadherin 17	Cdh17	-0.553028	0.780375	4.87031	0.0012058	9.63584	2.52023e-07	0.446678	0.995961	5.26758	0.00118114	2.25445	0.488818	1.12677	0.999804
12643	chondroadherin	Chad	-3.74504	0.058896	3.50937	0.00239155	7.50046	2.59286e-07	0.00704846	0.998991	7.85721	0.000219022	2.72485	0.510049	-0.246977	0.999804
21928	tumor necrosis factor, alpha-induced protein 2	Tnfaip2	-1.56036	0.174295	5.62559	7.65748e-08	5.52722	2.77234e-07	-0.277484	0.994293	5.86606	8.43e-06	1.33601	0.556405	0.31768	0.999804
14177	fibroblast growth factor 6	Fgf6	-0.01319	0.996184	5.40475	0.000720531	9.79962	3.22995e-07	0.462148	0.998051	6.09321	0.000226907	2.17601	0.509493	0.288676	0.999804
15957	interferon-induced protein with tetratricopeptide repeats 1	Ifit1	-4.78869	1.82317e-07	4.47767	4.58193e-12	2.66361	3.37805e-07	-4.05285	1.14e-05	7.2437	1.52e-09	-0.484973	0.80463	-2.66905	0.999804
14825	chemokine (C-X-C motif) ligand 1	Cxcl1	-0.735179	0.728764	7.76949	6.38776e-06	9.75258	3.45682e-07	0.566319	0.993497	7.90454	4.23e-05	2.20657	0.529093	-0.82767	0.999804
15016	histocompatibility 2, Q region locus 5	H2-Q5	-1.20522	0.332138	6.9682	2.09487e-08	6.17964	3.6166e-07	-3.60339	0.582345	5.34283	3.27e-05	-0.754788	0.813805	-2.15923	0.999804
224796	chloride intracellular channel 5	Clic5	-1.96297	0.0551272	9.74102	3.66327e-13	4.85639	3.79917e-07	-0.220686	0.995431	8.91743	4.19e-09	-0.384887	0.896532	-1.12236	0.999804
20310	chemokine (C-X-C motif) ligand 2	Cxcl2	-0.758146	0.758677	9.69909	5.29028e-06	11.8964	3.79917e-07	0.0992121	0.998865	9.40425	1.37e-05	2.49988	0.529476	1.0378	0.999804
20303	chemokine (C-C motif) ligand 4	Ccl4	-0.293809	0.7458	8.58324	4.97613e-12	5.07788	3.84942e-07	-1.34373	0.822483	6.05404	1.69e-08	0.270649	0.895438	0.344168	0.999804
71248	RIKEN cDNA 4933428M09 gene	4933428M09Rik	-0.633748	0.714109	5.01725	0.000468899	8.73571	3.85384e-07	-0.691282	0.987976	6.69531	2.15e-05	3.18047	0.329657	-0.243011	0.999804
20306	chemokine (C-C motif) ligand 7	Ccl7	-1.56926	0.253436	8.17279	2.01145e-08	7.12805	4.3776e-07	-1.08683	0.961687	6.08147	1.85e-05	2.16103	0.429536	-0.238696	0.999804
432555	predicted gene 5431	Gm5431	-0.76411	0.449123	9.20252	2.67066e-11	5.76169	4.38792e-07	-1.04383	0.935825	6.3202	9.02e-08	0.788369	0.690532	0.0428359	0.999804
14468	guanylate binding protein 2b	Gbp2b	-1.09606	0.526179	5.29635	0.000277559	8.71457	5.06043e-07	-1.12442	0.968898	6.48956	4.94e-05	2.22727	0.471631	-0.228738	0.999804
258737	olfactory receptor 1316	Olfr1316	0.29465	0.900761	6.86716	0.000154386	10.6789	5.1685e-07	0.0567573	0.998865	7.507	6.74e-05	2.2132	0.536977	-0.637198	0.999804
544791	myosin, heavy polypeptide 13, skeletal muscle	Myh13	0.533832	0.822972	6.31989	0.000689921	11.2677	5.3985e-07	-0.444075	0.998865	6.72856	0.000281338	1.68365	0.646467	-0.079388	0.999804
246727	2'-5' oligoadenylate synthetase 3	Oas3	-2.18798	0.124447	8.12131	1.85331e-08	6.87828	5.94389e-07	-1.66594	0.914621	5.81824	8.1e-05	1.55297	0.590764	0.809487	0.999804
231630	FIC domain containing	Ficd	-0.735145	0.684272	4.98327	0.000531558	8.62632	6.19871e-07	-0.0489489	0.998865	6.52886	0.000142475	2.3662	0.455329	-0.00750097	0.999804
381493	S100 calcium binding protein A7A	S100a7a	-3.65166	0.0404478	3.57681	0.00182106	6.9899	6.37707e-07	-0.859722	0.977942	7.00174	0.000210755	2.4083	0.519007	0.538091	0.999804
218440	ankyrin repeat domain 34B	Ankrd34b	1.27556	0.352181	4.42212	0.00085102	8.00317	7.21706e-07	0.171004	0.998865	5.19269	8.18e-06	1.04042	0.5941	-0.935762	0.999804
237504	Ras association (RalGDS/AF-6) domain family (N-terminal) member 9	Rassf9	-7.13732	0.00023384	0.174041	0.779078	3.5292	7.46083e-07	0.122874	0.998865	7.70172	0.00019959	3.08137	0.44207	0.88541	0.999804
226438	immunoglobulin-like and fibronectin type III domain containing 1	Igfn1	-0.310982	0.882	5.69477	0.000410968	9.37343	8.21642e-07	0.79262	0.985286	6.70004	8.6e-05	2.18703	0.509459	-0.10509	0.999804
11699	alpha 1 microglobulin/bikunin precursor	Ambp	-2.16016	0.245731	4.34667	0.00211394	8.41773	8.31809e-07	-1.10754	0.977284	6.97755	0.000135176	2.72119	0.450869	0.757308	0.999804
80861	DEXH (Asp-Glu-X-His) box polypeptide 58	Dhx58	-3.88636	3.25439e-05	4.42978	3.88505e-11	2.87256	8.80759e-07	-2.6935	0.0118224	5.82172	4.01e-07	1.44116	0.445202	-0.714969	0.999804
16680	keratin 84	Krt84	-0.0141697	0.996308	0.763711	0.730817	10.1368	9.32325e-07	-0.0617871	0.998865	6.3584	0.000410005	2.1304	0.550441	-0.52847	0.999804
11565	adenylosuccinate synthetase like 1	Adssl1	-0.297242	0.871823	4.10815	0.00228418	8.01883	9.63977e-07	-0.488147	0.994293	4.49597	0.00187594	1.76549	0.532939	-0.183777	0.999804
100033459	interferon activated gene 208	Ifi208	0.103169	0.965914	9.74	3.06216e-07	9.21057	1.06246e-06	-0.665968	0.99162	6.15467	0.000197276	1.96563	0.539183	-0.965836	0.999804
667370	interferon-induced protein with tetratricopeptide repeats 3B	Ifit3b	-5.29497	1.32101e-07	5.02157	5.84369e-14	2.23767	1.08159e-06	-3.429	1.36e-05	7.56998	3.09e-09	-0.180289	0.941748	-3.13885	0.999804
20821	tripartite motif-containing 21	Trim21	-3.60292	3.08686e-09	3.33161	1.67968e-13	1.63087	1.28164e-06	-1.28082	0.00123349	5.3562	3.09e-11	-0.432957	0.687617	-0.913657	0.999804
23920	insulin receptor-related receptor	Insrr	0.850025	0.392585	7.353	3.13899e-09	5.54011	1.70119e-06	-0.995402	0.951863	4.81371	1.44e-06	0.410613	0.834326	-0.844537	0.999804
171504	apolipoprotein B receptor	Apobr	-2.84423	0.00854501	4.3595	6.42037e-08	3.93213	1.73385e-06	-0.986014	0.897203	5.23335	2.84e-05	0.055944	0.98724	0.687801	0.999804
243958	sialic acid binding Ig-like lectin G	Siglecg	-1.24758	0.572611	6.02254	0.000590496	9.77149	1.79729e-06	-0.319777	0.998865	8.80424	1.73e-05	2.48981	0.513499	-0.238696	0.999804
327978	schlafen 5	Slfn5	-0.15123	0.82259	8.17302	6.18489e-14	3.59287	1.79778e-06	-1.08753	0.811831	5.09755	1.67e-09	-0.173439	0.913993	-0.752971	0.999804
17868	myosin binding protein C, cardiac	Mybpc3	-0.543613	0.832781	7.48636	0.000175822	10.8692	1.80643e-06	-0.0683029	0.998865	8.0557	0.000107775	3.05491	0.451649	0.793481	0.999804
16145	interferon gamma induced GTPase	Igtp	-4.30677	3.98943e-12	4.5415	6.51437e-18	1.21863	1.93424e-06	-2.11291	3.2e-08	5.9594	1.24e-13	-1.29105	0.277055	-1.1119	0.999804
434484	Sp140 nuclear body protein	Sp140	-0.840765	0.330946	6.70325	1.58312e-10	4.32586	2.02082e-06	-1.44926	0.808702	5.19347	4.74e-07	-0.178852	0.93905	-1.30833	0.999804
16193	interleukin 6	Il6	0.468138	0.811822	11.795	1.11109e-08	8.66272	2.11884e-06	1.1382	0.970045	7.67565	8.23e-06	1.59843	0.602018	-0.481249	0.999804
12525	CD8 antigen, alpha chain	Cd8a	-0.486918	0.816803	5.00136	0.00191616	8.91325	2.34894e-06	0.421987	0.998865	6.49173	0.000167671	2.28414	0.498298	0.695628	0.999804
58185	radical S-adenosyl methionine domain containing 2	Rsad2	-4.49106	1.94253e-06	6.74978	4.70507e-15	2.48212	2.55726e-06	-3.17026	0.000312649	8.27173	7.51e-10	-0.0728493	0.976487	-2.03678	0.999804
57355	cDNA sequence BC051019	BC051019	-4.65308	0.00213681	1.24943	0.114039	4.49355	2.55854e-06	0.515286	0.970497	7.04864	3.69e-05	1.66108	0.607371	0.566774	0.999804
17857	MX dynamin-like GTPase 1	Mx1	-3.21477	0.006019	8.93053	2.67798e-13	3.91072	2.79988e-06	-2.0749	0.592231	9.49884	2.38e-08	0.128389	0.971159	-1.9172	0.999804
21822	T cell specific GTPase 1	Tgtp1	-4.17371	9.31121e-07	7.12577	7.51689e-17	2.2471	3.02775e-06	-3.89992	5.49e-05	7.92421	1.46e-10	-0.676837	0.713309	-1.89378	0.999804
226101	myoferlin	Myof	-0.981291	0.73936	7.42776	0.000482185	11.0754	4.35529e-06	0.338587	0.998865	9.37176	0.000386524	3.8576	0.440588	0.193624	0.999804
16667	keratin 17	Krt17	1.01388	0.509998	6.21949	2.45482e-05	7.32391	4.9885e-06	-0.815021	0.981405	6.04025	9.48e-06	0.170289	0.961398	-2.03555	0.999804
545902	protein tyrosine phosphatase, receptor type, H	Ptprh	3.96394	0.0394164	6.86089	0.00065157	10.4831	5.04418e-06	-0.0700606	0.998865	3.98279	0.000220796	1.21581	0.544539	-0.137021	0.999804
12363	caspase 4, apoptosis-related cysteine peptidase	Casp4	-2.46932	0.0176931	7.70267	2.30936e-11	4.17923	5.35988e-06	-1.28513	0.859714	6.49445	6.32e-07	0.897385	0.693498	-0.780642	0.999804
14462	GATA binding protein 3	Gata3	-1.90533	0.280922	4.87837	0.000360975	7.04432	5.82812e-06	-0.743954	0.985286	6.87204	9.1e-05	1.61484	0.645448	1.04415	0.999804
216991	ArfGAP with dual PH domains 2	Adap2	-0.00936122	0.997967	7.89191	0.000488649	11.6124	5.90281e-06	-0.354895	0.998865	8.73791	0.000174735	2.57365	0.557539	0.562289	0.999804
15968	interferon alpha 5	Ifna5	-0.01319	0.993579	11.0791	2.47774e-14	4.37496	7.21823e-06	-0.0646948	0.998865	8.33023	2.52e-11	0.234469	0.904568	-0.238696	0.999804
54120	GIPC PDZ domain containing family, member 2	Gipc2	1.26155	0.622363	7.83153	0.000421929	11.1461	7.44271e-06	0.377659	0.998865	7.07706	0.000194391	1.53634	0.681509	-0.543431	0.999804
15451	hepsin	Hpn	0.370105	0.906401	7.98914	0.000592727	11.6677	8.29493e-06	0.391725	0.998865	8.25322	0.00028159	2.78785	0.51778	0.414107	0.999804
109032	Sp110 nuclear body protein	Sp110	-2.25593	0.0227198	5.89408	1.54604e-09	3.93308	9.38471e-06	-1.02396	0.910356	6.43582	3.52e-07	0.807057	0.711901	-1.00575	0.999804
76074	guanylate-binding protein 8	Gbp8	-1.92872	0.0364224	7.48765	1.82597e-11	3.92318	9.71984e-06	-2.09883	0.576242	6.22568	1.77e-07	1.83056	0.376998	0.213414	0.999804
15959	interferon-induced protein with tetratricopeptide repeats 3	Ifit3	-5.77923	1.25574e-08	4.78704	1.88325e-13	1.90778	1.04289e-05	-3.38765	2.26e-06	7.83621	6.29e-10	-0.39063	0.854575	-1.65819	0.999804
69987	sperm acrosome associated 9	Spaca9	-3.84089	0.416061	6.91501	0.00134657	10.7384	1.1156e-05	0.446127	0.998865	10.9831	0.0160108	5.12569	0.555659	1.40849	0.999804
75345	SLAM family member 7	Slamf7	-0.377769	0.733253	7.95979	8.2442e-10	4.81579	1.80994e-05	-0.6123	0.978005	5.39923	1.75e-06	0.606741	0.783614	0.146807	0.999804
13656	early growth response 4	Egr4	6.43734	0.00125404	6.80243	0.0010371	9.88591	1.87525e-05	0.869126	0.99119	1.67868	0.00606142	-0.380044	0.782443	-0.0520881	0.999804
15969	interferon alpha 6	Ifna6	-0.01319	0.993057	8.55401	6.97973e-13	3.86119	1.89286e-05	-0.0646948	0.998865	4.82329	1.56e-07	0.234469	0.895416	0.00756306	0.999804
83560	testis expressed gene 14	Tex14	-0.641281	0.692331	3.40723	0.00535874	5.94079	2.16183e-05	-1.56659	0.956845	6.65663	1.69e-05	0.642435	0.849821	-0.460557	0.999804
634650	guanylate binding protein 11	Gbp11	-1.68511	0.0143002	7.95383	2.33456e-14	2.86927	2.41326e-05	-2.84301	0.0373746	6.31829	1.3e-09	0.00388411	0.998165	-0.63861	0.999804
11705	anti-Mullerian hormone	Amh	0.564744	0.87081	7.61386	0.00330696	11.5991	5.51261e-05	0.112598	0.998865	7.37921	0.00195799	2.08423	0.653338	0.0678559	0.999804
664793	zona pellucida glycoprotein 4, pseudogene	Zp4-ps	-0.0174276	0.995276	5.49257	0.00122257	7.43838	6.38681e-05	0.737459	0.991153	7.4169	5.27e-05	3.5383	0.336496	-0.0796078	0.999804
433470	expressed sequence AA467197	AA467197	-0.889022	0.275024	7.03469	2.75063e-11	3.34968	6.43575e-05	-2.1084	0.495568	5.33681	1.61e-07	0.364149	0.849802	-0.487386	0.999804
381308	interferon activated gene 211	Ifi211	-2.0488	0.00653773	8.54541	1.37073e-14	2.74947	6.93417e-05	-1.06021	0.795569	5.58803	4.75e-08	0.740366	0.646428	-1.43904	0.999804
637079	IQ motif containing N	Iqcn	-0.0621661	0.95623	6.01659	1.05085e-08	3.8653	6.9689e-05	-0.663777	0.966609	8.45361	1.18e-10	0.777659	0.641568	0.392864	0.999804
16365	aconitate decarboxylase 1	Acod1	-0.253386	0.846378	8.56506	1.97198e-09	4.76668	9.76622e-05	-0.300545	0.998051	4.94801	2.79e-05	0.710655	0.773292	-0.239042	0.999804
66113	apolipoprotein A-V	Apoa5	-0.797382	0.687199	4.86336	0.00216753	6.77243	0.000103969	-0.318549	0.998865	7.40325	2.86e-05	3.22395	0.364181	0.530922	0.999804
620913	predicted gene 12185	Gm12185	-2.37606	0.0706427	7.64545	1.09438e-09	4.03294	0.000126067	-3.5651	0.480792	5.72469	6.97e-05	-0.517996	0.895879	-1.12195	0.999804
104382	BarH like homeobox 2	Barhl2	-0.00896068	0.995113	6.76871	7.42227e-09	4.09588	0.000136981	-0.0547409	0.998865	6.8208	2.12e-08	0.866826	0.646467	0.297932	0.999804
15407	homeobox B1	Hoxb1	-0.481143	0.807951	3.94761	0.00676543	6.14986	0.00013828	-1.03053	0.981405	6.73379	6.86e-05	2.06573	0.511297	-0.937019	0.999804
23960	2'-5' oligoadenylate synthetase 1G	Oas1g	-3.78114	1.56292e-07	5.4477	8.40938e-16	1.54463	0.000144975	-4.5976	2.24e-06	6.86824	4.16e-11	-1.70627	0.346169	-1.87038	0.999804
74409	hyaluronoglucosaminidase 6	Hyal6	-0.223757	0.967782	9.41901	0.00372059	13.3563	0.000148873	-0.662112	0.998865	9.95204	0.00313526	3.89403	0.544539	-1.0056	0.999804
15953	interferon gamma inducible protein 47	Ifi47	-3.03115	0.000132262	7.8379	2.6891e-15	2.21484	0.000176322	-3.66312	0.00241624	7.75181	2.36e-10	-1.07772	0.563077	-0.24397	0.999804
71355	collagen, type XXIV, alpha 1	Col24a1	1.70967	0.0929665	8.30577	2.38082e-09	4.46829	0.000176349	0.883522	0.961687	5.17212	1.85e-07	1.46888	0.385019	0.165274	0.999804
626578	guanylate-binding protein 10	Gbp10	-4.0603	1.81749e-05	5.36264	5.1286e-13	1.98135	0.000180447	-3.06644	0.00426034	6.13097	2e-07	-0.340749	0.89522	-1.37365	0.999804
74568	mixed lineage kinase domain-like	Mlkl	-1.32198	0.018534	6.87488	1.98293e-14	2.12643	0.000245806	-1.20761	0.591301	6.09877	7.35e-11	-0.201186	0.896658	-1.18084	0.999804
76645	polycystic kidney disease 1 like 2	Pkd1l2	-0.900198	0.869369	9.50613	0.00452257	13.0507	0.000266613	-0.383969	0.998865	11.2327	0.00785825	4.86659	0.544539	0.523136	0.999804
27056	interferon regulatory factor 5	Irf5	-2.33848	0.119363	5.06094	4.81087e-06	4.07282	0.000302742	-2.45022	0.803797	4.45491	0.00349305	0.599762	0.884805	0.879401	0.999804
227929	cytohesin 1 interacting protein	Cytip	0.885916	0.569528	8.26234	2.98395e-07	5.48064	0.00037251	-0.265392	0.998865	4.93883	0.0002039	0.487987	0.886321	-0.499969	0.999804
17472	guanylate binding protein 4	Gbp4	-3.07362	0.000178139	7.60263	4.93376e-15	2.04438	0.000468184	-3.11814	0.0099991	7.31259	1.63e-09	-1.82444	0.429536	-2.35388	0.999804
15962	interferon alpha 1	Ifna1	-0.01319	0.994485	8.77448	1.45491e-11	3.35888	0.000832369	-0.0646948	0.998865	6.7003	8.44e-09	0.234469	0.917014	-0.238696	0.999804
234421	calcium and integrin binding family member 3	Cib3	-0.636353	0.921124	10.288	0.0084789	13.7587	0.000837679	-0.552511	0.998865	12.9715	0.00468877	4.48042	0.599067	-0.2852	0.999804
621823	protease (prosome, macropain) activator subunit 2B	Psme2b	-0.645775	0.467989	7.6028	6.69068e-11	3.05357	0.000843929	-0.626844	0.963015	4.65922	2.09e-06	0.176005	0.937321	-0.255062	0.999804
226691	interferon activated gene 207	Ifi207	-0.575122	0.575594	8.67086	4.08351e-11	3.31507	0.000980401	-1.26131	0.905638	4.15107	4.95e-05	-0.0683915	0.979693	-0.449368	0.999804
226695	interferon activated gene 205	Ifi205	-3.42264	2.86816e-05	7.08804	6.59863e-15	1.77752	0.00135142	-1.70447	0.177392	5.27593	1.84e-07	-0.168764	0.940731	-0.754069	0.999804
12810	cochlin	Coch	3.735	1.52984e-09	6.33837	2.36113e-13	1.92595	0.00136838	-0.244425	0.982544	2.1242	6.98e-10	0.641679	0.214428	0.203156	0.999804
100504518	RIKEN cDNA 3425401B19 gene	3425401B19Rik	-0.744236	0.548639	7.11031	6.24163e-08	3.8432	0.00161199	-0.795741	0.970045	5.40315	1.27e-05	0.722323	0.777886	-0.238696	0.999804
18507	paired box 5	Pax5	2.44632	0.0370136	7.15396	4.21824e-07	4.2293	0.00169044	0.40148	0.994208	3.21972	0.000194491	-2.79119	0.320778	-1.87504	0.999804
102639543	interferon activated gene 206	Ifi206	-0.699244	0.484341	9.2503	1.54268e-11	3.13083	0.0019203	-1.23352	0.897203	5.67615	4.42e-07	0.10411	0.967229	-0.421924	0.999804
22169	cytidine monophosphate (UMP-CMP) kinase 2, mitochondrial	Cmpk2	-2.82193	1.69971e-08	4.9723	2.55449e-15	0.997576	0.00197473	-0.680992	0.453617	4.45648	5.52e-11	-0.314888	0.716329	-0.172841	0.999804
18356	olfactory receptor 56	Olfr56	-0.671411	0.479949	7.68398	1.78489e-10	2.90096	0.00264381	-1.23371	0.881198	5.19944	9.18e-07	0.654208	0.729442	-0.749489	0.999804
623121	interferon activated gene 213	Ifi213	-1.04933	0.415943	9.59698	4.21963e-10	3.63629	0.00291264	-0.237559	0.998865	5.99795	7.11e-06	0.475533	0.87803	-0.382715	0.999804
71281	apolipoprotein B mRNA editing enzyme, catalytic polypeptide-like 4 (putative)	Apobec4	-0.254304	0.811886	6.60669	7.59618e-09	3.03273	0.00296852	-0.449506	0.983678	5.74782	2.98e-07	-0.194853	0.938477	-0.789444	0.999804
68487	transmembrane protein 140	Tmem140	-1.57649	0.122242	7.37906	1.34308e-10	2.64336	0.0045537	0.137622	0.998865	5.42947	4.73e-06	0.86326	0.695839	0.628136	0.999804
15965	interferon alpha 2	Ifna2	-0.543642	0.605671	9.97324	9.64232e-12	2.83145	0.00788075	-0.0612133	0.998865	7.74944	3.8e-09	0.967818	0.622449	-0.238696	0.999804
246728	2'-5' oligoadenylate synthetase 2	Oas2	-4.82296	5.4939e-06	4.57792	1.03403e-11	1.36865	0.0098089	-2.9709	0.00479566	6.29291	4.52e-07	0.257786	0.926788	-1.31524	0.999804
15951	interferon activated gene 204	Ifi204	-3.43258	1.52011e-05	6.86662	3.45923e-15	1.31339	0.0118163	-1.43321	0.275704	5.9584	1.29e-08	-0.452803	0.815326	-0.18555	0.999804
12223	betacellulin, epidermal growth factor family member	Btc	-3.98864	0.000106933	5.10148	5.97656e-11	1.6037	0.0128795	-0.924636	0.843972	6.0792	9.66e-07	0.565567	0.817932	0.819977	0.999804
15227	forkhead box F1	Foxf1	-3.32716	0.000421109	5.03423	3.66429e-10	1.58684	0.0229693	-0.656041	0.943401	5.42113	1.61e-06	0.157705	0.953108	0.249675	0.999804
223672	apolipoprotein L 9a	Apol9a	-4.84973	1.5074e-07	4.01558	6.97973e-13	0.917142	0.0270148	-4.20893	1.19e-05	6.21255	1.78e-08	-0.241715	0.916755	-0.442322	0.999804
16168	interleukin 15	Il15	-2.71101	0.00593581	5.5755	3.96712e-10	1.70231	0.0282134	0.528716	0.961687	4.24743	0.000106674	-0.230745	0.93905	-0.75823	0.999804
22035	tumor necrosis factor (ligand) superfamily, member 10	Tnfsf10	-1.80138	0.0296724	7.26177	3.33916e-12	1.67942	0.0295257	-2.47552	0.267363	6.40228	2.38e-08	-0.17979	0.940915	-1.33049	0.999804
100042856	predicted gene 4070	Gm4070	-0.319895	0.815527	8.36574	7.7608e-09	2.76233	0.0316376	-0.363295	0.994293	4.53667	0.000166867	1.01627	0.674792	0.121575	0.999804
74153	ubiquitin-like modifier activating enzyme 7	Uba7	-4.6854	1.59283e-07	3.30425	3.90935e-11	-1.07026	0.0489445	-2.50672	0.000157085	5.5247	7.68e-08	-0.942913	0.628968	-1.08506	0.999804
215900	calcium homeostasis modulator family member 6	Calhm6	-0.0511975	0.96353	8.00794	4.31231e-11	1.79624	0.0562095	-1.64759	0.757504	3.4334	8.82e-05	-0.448212	0.820337	-0.751356	0.999804
74735	tripartite motif-containing 14	Trim14	-1.82072	0.00221511	6.18478	7.64876e-14	1.04164	0.0632001	-1.87212	0.105199	5.5177	9e-10	-1.53077	0.376185	0.0463944	0.999804
225594	predicted gene 4841	Gm4841	2.07435	0.0027331	6.6617	1.8408e-10	1.59329	0.074351	-1.62854	0.766563	4.09483	2.75e-09	-1.37983	0.336496	-0.969311	0.999804
20684	nuclear antigen Sp100	Sp100	-3.04926	9.65403e-05	6.29956	8.04612e-14	0.826297	0.159516	-4.20967	0.000243352	6.14525	9.63e-09	-1.07083	0.544151	-1.04516	0.999804
209387	tripartite motif-containing 30D	Trim30d	-5.52342	2.55397e-12	3.29097	1.29041e-15	-0.269248	0.256003	-1.97748	4.92e-08	5.73319	1.68e-11	-1.69023	0.287495	-1.19788	0.999804
236451	PHD finger protein 11B	Phf11b	-2.51474	0.000880123	6.69325	2.80364e-13	-0.702604	0.3385	-2.49391	0.0575775	3.95605	7.82e-06	-0.883293	0.591491	-0.827218	0.999804
276950	schlafen 8	Slfn8	-4.50081	4.94922e-08	5.6328	3.1689e-16	0.373863	0.357822	-3.75166	6.78e-06	7.3399	9.12e-11	-1.18192	0.51085	-1.33418	0.999804
142980	toll-like receptor 3	Tlr3	-3.84179	9.58358e-10	4.02524	1.69288e-14	0.248284	0.422959	-0.869197	0.0667793	4.57731	4.43e-10	-0.750284	0.513138	-0.432075	0.999804
100039796	T cell specific GTPase 2	Tgtp2	-3.14381	0.0231942	7.81724	1.0997e-10	0.819064	0.490236	-4.54692	0.320777	7.36726	8.89e-06	-1.84439	0.633587	-0.967236	0.999804
20556	schlafen 2	Slfn2	-3.03787	0.00166119	6.73869	1.55718e-11	0.454647	0.614433	-2.50833	0.287807	6.18412	3.68e-07	0.58788	0.79965	-0.302748	0.999804
219132	PHD finger protein 11D	Phf11d	-2.56172	3.67055e-05	6.72724	4.89918e-16	0.205108	0.705995	-3.38265	0.00018942	6.13291	1.45e-10	-1.79521	0.330769	-1.65803	0.999804
21355	transporter 2, ATP-binding cassette, sub-family B (MDR/TAP)	Tap2	-3.92395	1.12264e-10	3.04215	2.80364e-13	-0.0809763	0.78497	-0.644426	0.184199	3.62274	5.15e-09	-0.496714	0.604829	-0.681892	0.999804
240328	RIKEN cDNA F830016B08 gene	F830016B08Rik	-3.56206	1.65058e-09	4.39074	1.96112e-16	-0.0287437	0.935059	-5.0518	1.77e-08	5.59609	5.5e-12	-0.573909	0.574142	-0.965522	0.999804
71898	apolipoprotein L 9b	Apol9b	-5.05434	7.8192e-07	3.66045	5.5056e-11	-0.0423757	0.946009	-4.37147	9.84e-05	6.65882	5.85e-08	-0.688403	0.774208	-1.71415	0.999804
